# Supplementary material for: Modeling impacts of climate change and grazing effects on plant biomass and soil organic carbon in the Qinghai–Tibetan grasslands
Source: Copernicus journal article supplement (doi:10.5194/bg-2017-272), 2017-08-14
Supplement: Supplementary file 1 [file bg-2017-272-supplement.pdf]

Table S1. Changes in livestock(million heads) in Qinghai province during the period from 1949 (data from Zhang (2011)) to 2015 (data from QPBS (2015)).

| <b>Livestock</b>    | <b>1949</b> | <b>1978</b> | <b>1980</b> | <b>1985</b> | <b>1990</b> | <b>1992</b> | <b>1993</b> | <b>1994</b> | <b>1995</b> | <b>1996</b> | <b>1997</b> | <b>1998</b> | <b>1999</b> | <b>2000</b> | <b>2001</b> |
|---------------------|-------------|-------------|-------------|-------------|-------------|-------------|-------------|-------------|-------------|-------------|-------------|-------------|-------------|-------------|-------------|
| Yaks                |             | 4.97        | 4.87        | 5.16        | 5.39        | 5.51        | 5.09        | 5.24        | 5.01        | 4.43        | 4.22        | 3.94        | 3.78        | 3.91        | 4.01        |
| Sheep and goats     |             | 16.45       | 16.13       | 13.28       | 16.08       | 16.48       | 16.35       | 16.77       | 16.66       | 15.70       | 16.01       | 16.39       | 16.40       | 16.42       | 16.76       |
| Other large Animals |             | 0.71        | 0.67        | 0.74        | 0.74        | 0.72        | 0.66        | 0.63        | 0.58        | 0.62        | 0.60        | 0.57        | 0.53        | 0.51        | 0.54        |
| Total livestock     | 7.49        | 22.13       | 21.67       | 19.18       | 22.21       | 22.71       | 22.10       | 22.65       | 22.25       | 20.75       | 20.83       | 20.91       | 20.71       | 20.83       | 21.31       |
| <b>Livestock</b>    | <b>2002</b> | <b>2003</b> | <b>2004</b> | <b>2005</b> | <b>2006</b> | <b>2007</b> | <b>2008</b> | <b>2009</b> | <b>2010</b> | <b>2011</b> | <b>2012</b> | <b>2013</b> | <b>2014</b> | <b>2015</b> |             |
| Yaks                | 4.11        | 4.06        | 4.04        | 4.06        | 4.50        | 4.47        | 4.45        | 4.45        | 4.36        | 4.42        | 4.74        | 4.52        | 4.44        | 4.80        |             |
| Sheep and goats     | 17.33       | 17.62       | 17.64       | 17.66       | 15.02       | 14.97       | 14.97       | 14.98       | 15.05       | 14.98       | 15.12       | 14.42       | 14.21       | 14.31       |             |
| Other large Animals | 0.52        | 0.50        | 0.49        | 0.47        | 0.36        | 0.41        | 0.39        | 0.36        | 0.36        | 0.36        | 0.34        | 0.33        | 0.32        | 0.32        |             |
| Total livestock     | 21.95       | 22.18       | 22.17       | 22.19       | 19.88       | 19.85       | 19.81       | 19.78       | 19.77       | 19.76       | 20.21       | 19.27       | 18.97       | 19.42       |             |

Table S2. Livestock grazing intensity in each county in the study area.

| County           | Grazing Intensity                       |                                              | County         | Grazing Intensity                       |                                              |
|------------------|-----------------------------------------|----------------------------------------------|----------------|-----------------------------------------|----------------------------------------------|
|                  | Yak/Cattle<br>(heads ha <sup>-1</sup> ) | Sheep and Goats<br>(heads ha <sup>-1</sup> ) |                | Yak/Cattle<br>(heads ha <sup>-1</sup> ) | Sheep and Goats<br>(heads ha <sup>-1</sup> ) |
| <b>Tianjun</b>   | 0.04                                    | 0.32                                         | <b>Banma</b>   | 0.29                                    | 0.32                                         |
| <b>Dulan</b>     | 0.02                                    | 0.16                                         | <b>Maqin</b>   | 0.24                                    | 0.27                                         |
| <b>Wulan</b>     | 0.04                                    | 0.40                                         | <b>Guinan</b>  | 0.24                                    | 1.39                                         |
| <b>Delinha</b>   | 0.01                                    | 0.11                                         | <b>Xinghai</b> | 0.18                                    | 1.03                                         |
| <b>Geermu</b>    | 0.01                                    | 0.05                                         | <b>Guide</b>   | 0.18                                    | 1.03                                         |
| <b>Xisanzhen</b> | 0.03                                    | 0.23                                         | <b>Tongde</b>  | 0.36                                    | 2.10                                         |
| <b>Qumalai</b>   | 0.04                                    | 0.09                                         | <b>Gonghe</b>  | 0.16                                    | 0.94                                         |
| <b>Nangqian</b>  | 0.18                                    | 0.38                                         | <b>Henan</b>   | 0.38                                    | 0.92                                         |
| <b>Zhiduo</b>    | 0.02                                    | 0.05                                         | <b>Zeku</b>    | 0.40                                    | 0.98                                         |
| <b>Chengduo</b>  | 0.13                                    | 0.29                                         | <b>Jianzha</b> | 0.61                                    | 1.48                                         |
| <b>Zaduo</b>     | 0.04                                    | 0.10                                         | <b>Tongren</b> | 0.29                                    | 0.69                                         |
| <b>Yushu</b>     | 0.15                                    | 0.32                                         | <b>Gangcha</b> | 0.25                                    | 1.28                                         |
| <b>Maduo</b>     | 0.05                                    | 0.06                                         | <b>Haiyan</b>  | 0.24                                    | 1.20                                         |
| <b>Jiuzhi</b>    | 0.20                                    | 0.22                                         | <b>Qilian</b>  | 0.19                                    | 0.95                                         |
| <b>Dari</b>      | 0.16                                    | 0.18                                         | <b>Menyuan</b> | 0.32                                    | 1.63                                         |
| <b>Gande</b>     | 0.31                                    | 0.34                                         |                |                                         |                                              |

The number of horses has decreased each year and at the end of 2014, the number of horses only accounted for 1.7% of the total number of grazing livestock. Therefore, we combined the data for horses and cattle to calculate the grazing intensity. The baseline grazing intensity was based on the grazing data from 2005, which was the highest in recent decades, and the grassland monitoring project also started in that year.

Table S3. Livestock grazing parameters employed in this study.

| <b>Parameters</b>                              | <b>Yak/Cattle</b> | <b>Sheep</b> | <b>Horse</b> |
|------------------------------------------------|-------------------|--------------|--------------|
| <b>Daily C intake (kg C head<sup>-1</sup>)</b> | 2.48              | 0.50         | 4.01         |
| <b>Milk C fraction (%)</b>                     | 0.00              | 0.00         | 0.00         |
| <b>Meat C fraction (%)</b>                     | 0.05              | 0.04         | 0.05         |
| <b>Urine C fraction (%)</b>                    | 0.02              | 0.06         | 0.02         |
| <b>Dung C fraction (%)</b>                     | 0.44              | 0.42         | 0.44         |
| <b>Enteric CH<sub>4</sub> C fraction (%)</b>   | 0.02              | 0.03         | 0.02         |
| <b>Respiration C fraction (%)</b>              | 0.46              | 0.45         | 0.46         |
| <b>Milk N fraction (%)</b>                     | 0.00              | 0.00         | 0.00         |
| <b>Meat N fraction (%)</b>                     | 0.30              | 0.30         | 0.30         |
| <b>Urine N fraction (%)</b>                    | 0.35              | 0.49         | 0.35         |
| <b>Dung N fraction (%)</b>                     | 0.35              | 0.21         | 0.35         |

Table s4. Input values for the main grassland type parameters used in the DNDC model.

| Parameters                                                                          | Mountain meadow subclass | Alpine steppe | Lowland saline meadow subtype | Alpine meadow subtype | Alpine swamp meadow subtype | Alpine desert | Desert soil subclass |
|-------------------------------------------------------------------------------------|--------------------------|---------------|-------------------------------|-----------------------|-----------------------------|---------------|----------------------|
| Maximum biomass production (kg C ha <sup>-1</sup> year <sup>-1</sup> ) <sup>a</sup> | 1157                     | 798           | 879                           | 2786                  | 3586                        | 1441          | 672                  |
| Grain fraction of biomass <sup>b</sup>                                              | 0.04                     | 0.03          | 0.03                          | 0.02                  | 0.02                        | 0.01          | 0.01                 |
| Leaf and stem fraction of biomass <sup>b</sup>                                      | 0.40                     | 0.40          | 0.42                          | 0.60                  | 0.40                        | 0.11          | 0.28                 |
| Root fraction of biomass <sup>b</sup>                                               | 0.56                     | 0.57          | 0.55                          | 0.38                  | 0.58                        | 0.88          | 0.71                 |
| C/N ratio of grain <sup>c</sup>                                                     | 34                       | 31            | 31                            | 34                    | 33                          | 26            | 25                   |
| C/N ratio of leaf and stem <sup>c</sup>                                             | 33                       | 30            | 30                            | 32                    | 31                          | 22            | 24                   |
| C/N ratio of root <sup>c</sup>                                                      | 40                       | 48            | 22                            | 59                    | 58                          | 25            | 19                   |
| Water requirement <sup>c</sup> (kg water kg <sup>-1</sup> dry matter)               | 200                      | 200           | 200                           | 200                   | 200                         | 200           | 200                  |
| Max height (m) <sup>a</sup>                                                         | 0.5                      | 0.6           | 0.5                           | 0.4                   | 0.4                         | 0.5           | 1                    |
| TDD <sup>d</sup>                                                                    | 1000                     | 1500          | 1000                          | 1500                  | 1500                        | 1000          | 1000                 |
| N fixation index <sup>d</sup>                                                       | 1.5                      | 1.5           | 1.5                           | 1.5                   | 1.5                         | 1.5           | 1.5                  |

<sup>a</sup>Parameters derived from field observations; <sup>b</sup>parameters derived from (ji et al., 1995); <sup>c</sup>parameters derived from (cai et al., 2007; li et al., 2016; lin et al., 2014); <sup>d</sup>parameters derived from the default values in the DNDC model.

## References

- cai, L. M., yan, L. H., wei, S. D., and xing, L. L.: Water Use Efficiency and Nitrogen Use Efficiency of Alpine Plants Grown in the East of Qinghai-Tibet Plateau, *Acta Botanica Boreali-Occidentalia Sinica*, 2007. 1216-1224, 2007.
- ji, W. Q., min, Z. X., qing, Z. Y., and xi, S. Z.: Community structure and biomass dynamic of the *Kobresia pygmaea* steep meadow, *Acta Phytocologica Sinica*, 19,, 225-

235, 1995.

li, Z. L., hua, S. M., feng, Y. T., and hai, Y. F.: Feeding preference of *Gynaephora menyuanensis* and its relationships with plant carbon and nitrogen contents in an alpine meadow on the Tibetan plateau, *ACTA ECOLOGICA SINICA*, 2016. 2319-2326, 2016.

lin, W. J., ming, Z. Z., hong, W. Z., xiong, C. B., qun, Y. C., xiang, H. X., xi, S. Z., Dacizhuoga, and zhou, Z. X.: Soil C/N distribution characteristics of alpine steppe ecosystem in Qinhai-Tibetan Plateau, *ACTA ECOLOGICA SINICA*, 2014. 6678-6691, 2014.

QPBS: 'Qinghai Statistical Yearbook 2015.'(China Statistics Press:Beijing), 2015. 2015.

Zhang, B.: On the Livestock Development of Qinghai Province during the Time of Republic of China (1912—1949) , *Ancient and Modern Agriculture*, 2011. 91-100, 2011.

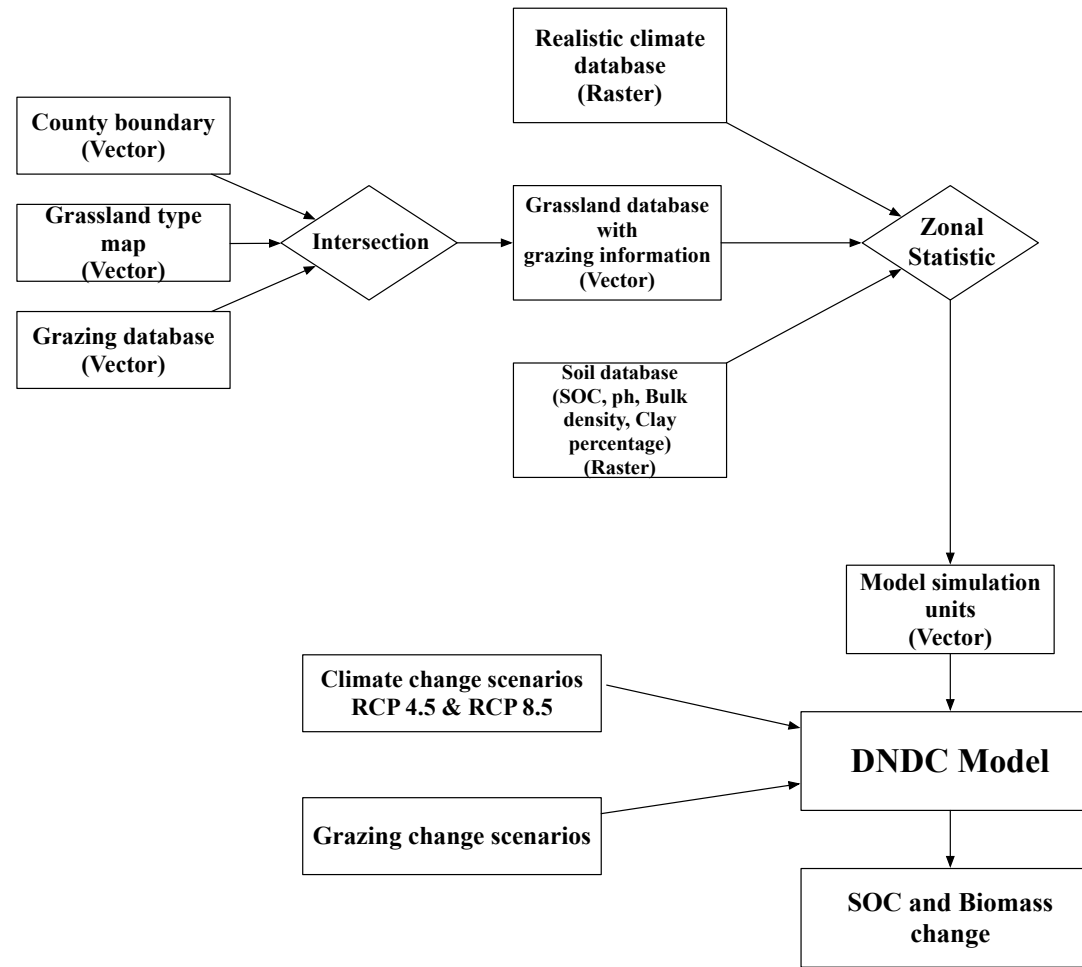

Fig. S1. The flowchart of model data preparation and simulation. The vector and raster inside the brackets indicate the input data format, and the intersection and zonal statistic inside the rhombus indicate the ArcGIS algorithm applied to process the data.

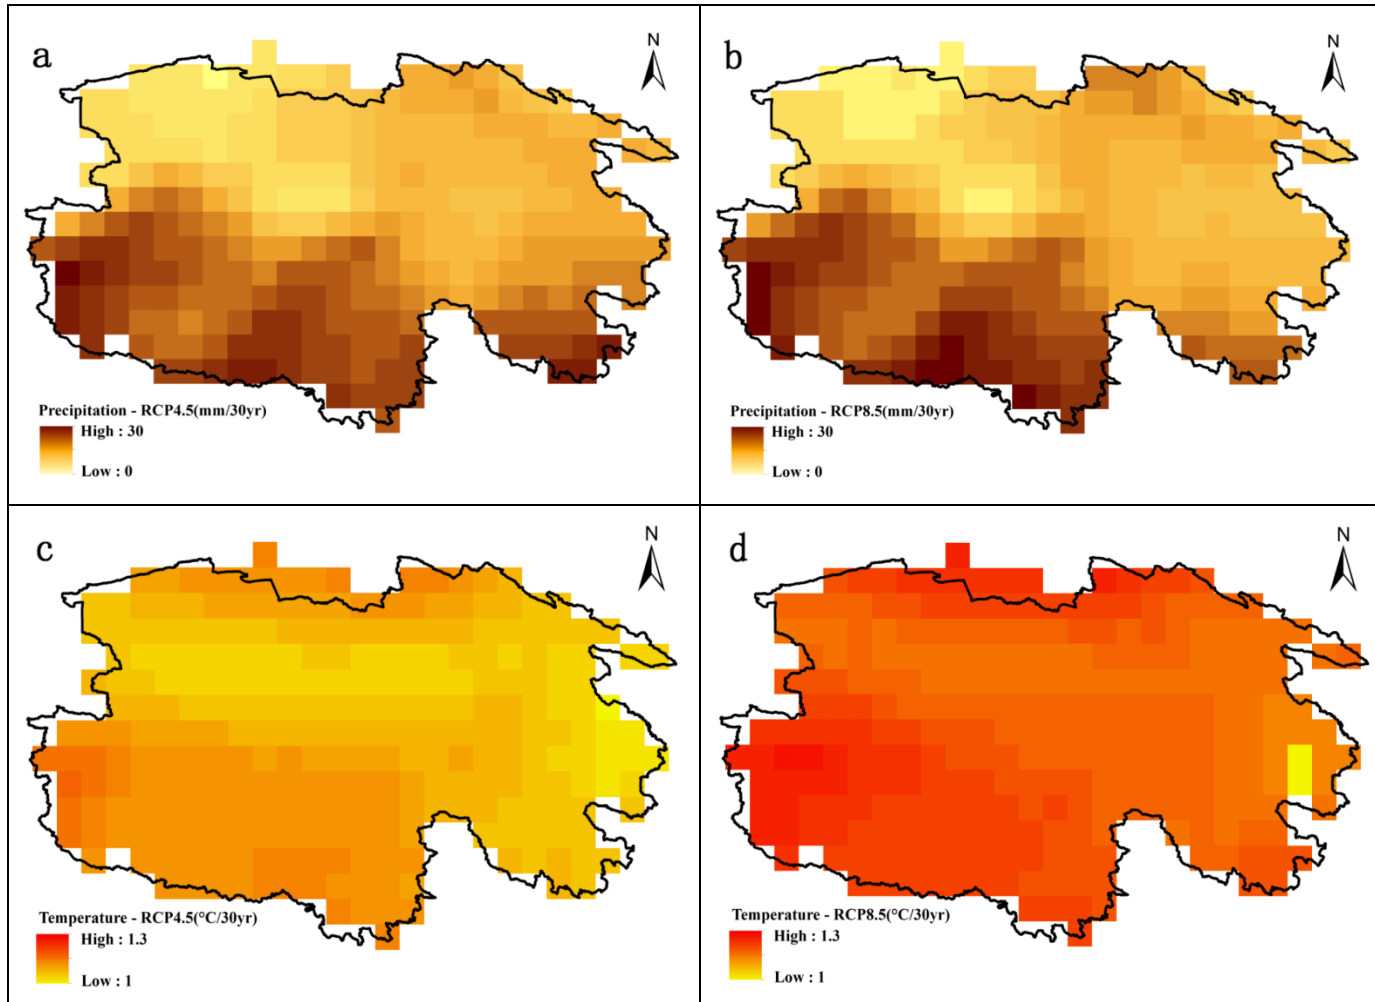

Fig. S2. Spatial distributions of precipitation and changes in temperature under the RCP4.5 (a, c) and RCP 8.5 (b, d) climate change scenarios up to 2044.
