# Supplementary material for: Modeling impacts of climate change and grazing effects on plant biomass and soil organic carbon in the Qinghai–Tibetan grasslands
Source: Copernicus journal article supplement (doi:10.5194/bg-2017-272), 2017-08-14
Supplement: Supplementary file [file bg-2017-272-AC2-supplement.pdf]

1 **Modeling impacts of climate change and grazing effects on plant**  
2 **biomass and soil organic carbon in the Qinghai–Tibetan**  
3 **grasslands**

4 Wenjuan Zhang<sup>1,2</sup>, Feng Zhang<sup>3</sup>, Jiaguo Qi<sup>4</sup>, Fujiang Hou\*<sup>1</sup>

5 1 College of Pastoral Agriculture Science and Technology, State Key Laboratory of Grassland Agro-  
6 ecosystems, Lanzhou University, Lanzhou, 730020, China

7 2 Grassland Management Administration of Qinghai Province, Xining, Qinghai, 810008, China

8 3 Institute of Arid Agroecology, School of Life Sciences, State Key Laboratory of Grassland Agro-  
9 ecosystems, Lanzhou University, Lanzhou, Gansu, 730000, China

10 4 Center for Global Change and Earth Observations, Michigan State University, East Lansing, MI  
11 48823, USA

12

13 **Abstract:**

14 The Qinghai Province supports over 40% of the human population but occupies about 29% of  
15 the land area, and thus it plays an important role in the entire Qinghai–Tibetan Plateau (QTP).

16 The dominant land cover is grassland, which has been severely degraded over the last decade  
17 due to a combination of increased human activities and climate change. Numerous studies  
18 indicate that the plateau is sensitive to recent global climate change, but the drivers and  
19 consequences of grassland ecosystem change are controversial, especially the effects of climate  
20 change and grazing patterns on the grassland biomass and soil organic carbon (SOC) storage in  
21 this region. In this study, we used the DeNitrification-DeComposition (DNDC) model and two  
22 climate change scenarios (representative concentration pathways: RCP4.5 and RCP8.5) to  
23 understand how the grassland biomass and SOC pools might respond to different grazing  
24 intensities under future climate change scenarios. More than 1400 grassland biomass sampling  
25 points and 46 SOC points were collected, which were then used to validate the simulated results.

26 The results showed that compared with the past 30 years, the biomass and SOC exhibited a  
27 significant decreasing trend under all grazing intensities in the RCP4.5 and RCP8.5 scenarios,  
28 and RCP8.5 had a more negative effect on the biomass compared with RCP4.5. Future climate  
29 change could lead to greater temporal and spatial variations in the grassland biomass and SOC.

删除的内容: future

删除的内容: Thus, f

32 Overall, climate change may be the major factor that leads to fluctuations in the inter-annual  
33 grassland biomass on the Qinghai Province, where the grazing intensity has significantly  
34 affected the grassland vegetation dynamics. Therefore, urgent ecological conservation of  
35 vulnerable grassland ecosystems is required to effectively regulate grazing practices.

36 **Keywords:** Biogeochemical process; DNDC; Grazing intensity; Grassland management;  
37 Degradation;

## 38 1 Introduction

39 Grassland is one of the most widespread terrestrial ecosystems and accounts for nearly 33% of  
40 the land without ice cover (Ellis and Ramankutty, 2008), where it plays important roles in both  
41 the global carbon cycle and terrestrial ecosystem processes (Li et al., 2013c). The Qinghai-  
42 Tibetan Plateau (QTP) covers an area of approximately 130 million hectares (ha), 44% of  
43 China's total grassland, (Li et al., 2013a; Piao et al., 2012). This area plays a vital role for the  
44 ecological services of China and Southeast Asian countries (Harris, 2010; Li et al., 2013b; Piao  
45 et al., 2012; Wang et al., 2002; Zeng et al., 2015). Qinghai Province supports over 40% of the  
46 population but it has about 29% of the total area, and thus it plays an important role in the whole  
47 QTP (Li et al., 2013a; Piao et al., 2012). This area is recognized as one of the most ecologically  
48 fragile and sensitive areas to global climate change and human disturbance (Harris, 2010; Li et  
49 al., 2013b; Piao et al., 2012; Wang et al., 2002; Zeng et al., 2015). Moreover, this area is also  
50 the largest animal husbandry production region in China, and it also contains the headwaters of  
51 the two major rivers in China, i.e., the Yellow River and the Yangtze River, and thus it plays a  
52 vital role in ecological conservation in China (Zeng et al., 2015).

53 In recent decades, due to climate change, increased human disturbances, the high altitude alpine  
54 grassland ecosystems, which are the dominant grassland vegetation type, have been severely  
55 degraded (Gao et al., 2010). The air temperature on the plateau has increased by 0.3°C per  
56 decade, which is three times the global average (Li et al., 2008). Warming could significantly  
57 increase the net primary productivity of alpine meadows (Chen et al., 2013; Du et al., 2004;  
58 Fan et al., 2010). Other studies have found that warming also speeds up the decomposition rate  
59 for litter and manure, and increases soil respiration (Luo et al., 2010; Xu et al., 2010), which

删除的内容: The Qinghai-Tibetan Plateau (QTP), an area of approximately 130 million hectares (ha), amounts to 44% of China's grassland area. The Qinghai-Tibetan Plateau (QTP), which about 130 million hectares (ha), it counted 44% of China's grassland area

65 could cause significant losses of soil organic carbon (SOC) and affect the alpine grassland  
66 ecosystem carbon pool balance (Pei et al., 2009; Tan et al., 2010). Although the ecological  
67 impact of warming on the QTP alpine grassland ecosystem has not been fully elucidated in  
68 previous studies, there is no doubt that warming will greatly accelerate the key processes in the  
69 alpine grassland ecosystem carbon cycle (Luo et al., 2010). There are reported that both  
70 precipitation amount and the number of precipitation days have increased significantly in QTP  
71 (Li et al., 2010). As precipitation is another crucial climate factor in controlling the carbon cycle  
72 of grassland ecosystems, how the higher variability precipitation impacts the SOC and biomass  
73 in QTP need further investigation (Lehnert et al., 2016; Maussion et al., 2014).

74 Grazing is the most important biotic factor among the ecological processes that affect rapid  
75 changes in the vegetation and soil, and it is the main method for deriving ecosystem services  
76 from the QTP grassland (Tanentzap and Coomes, 2012). Moreover, grazing is one of the major  
77 human disturbances to the grassland in this area. In general, overgrazing is considered to be one  
78 of the main causes of carbon and nitrogen losses from the soil, thereby contributing to the  
79 unsustainable use of grassland (McIntire and Hik, 2005). Therefore, sustaining a reasonable  
80 grazing intensity has an indispensable role in maintaining the turnover of soil nutrients and  
81 plant community stability (Klein et al., 2007).

82 Previous studies have shown that different types of vegetation and soil nutrient pools exhibit  
83 significantly different responses to variations in the grazing intensity (Lavado et al., 1996).  
84 However, there is still a lack of robust studies to evaluate the combined effect of grazing and  
85 climate change, as well as their impact on the QTP grassland ecosystem at a large scale. Due to  
86 the unique geographic characteristics and important ecological functions of the QTP grassland  
87 ecosystem, it is necessary to evaluate the impacts of human management and climate change to  
88 ensure that it continues to provide these ecosystem services.

89 In this study, using a well-calibrated DeNitrification-DeComposition (DNDC) model based on  
90 long-term vegetation observations, we evaluated the response of the grassland ecosystem in  
91 Qinghai Province in terms of both climate change and human management by analyzing the  
92 grazing intensity. We also analyzed the interactions between grassland vegetation and soil  
93 carbon storage with grazing intensity and climate change disturbances at a large scale in long-  
94 term impact assessments.

## 95 2 Materials and methods

### 96 2.1 Study area

97 Qinghai Province (89°35′–103°04′ E, 31°39′–39°19′ N) is located in the northeast of QTP in  
98 China (Fig. 1). This region has a typical plateau climate, with a mean annual temperature of  
99 8.6°C (from –6°C to 9°C [across the study area](#)) and a mean annual precipitation of 424.7 mm  
100 (16.7–776.1 mm [across the study area](#)). In general, the climate is cold and dry. The altitude of  
101 Qinghai province ranges between 1,650–6,860 meters above sea level (m a.s.l.) and 67% of the  
102 land area is in the range of 3,000–5,000 masl. Grassland is the major land cover in the study  
103 area where alpine meadow and alpine steppe are the dominant vegetation types, where they  
104 account for 60.5% of the total grassland area.

105 Grazing is the primary human activity in the study area and livestock production is a key  
106 industry in this region. Generally, natural grassland is the major food source for the livestock  
107 in the QTP. Compared with 1949, the number of livestock has increased by almost three times  
108 from  $7.49 \times 10^6$  (Zhang, 2011) to the peak number  $22.19 \times 10^6$  head in 2005 at the study area  
109 (QPBS, 2015, 2005).

110 Since 2004, the Chinese government has implemented a series of ecological protection projects  
111 and policies in Qinghai province, including reducing livestock and prohibiting grazing, building  
112 fences to allow natural grassland recovery, as well as providing allowances and awards to local  
113 herdsmen families to promote degraded pasture recovery and to balance the livestock rate  
114 according to the forage productivity (Zeng et al., 2015). The core objective of these projects  
115 and policies is changing the grazing intensity and achieving a balance between the livestock  
116 intensity and grassland regenerability in order to construct a sustainable grassland ecosystem.

117 Due to new policies for ecological protection, the livestock numbers have declined in recent  
118 years, but they have been maintained at the 2015 level of  $19.42 \times 10^6$  head (supplementary  
119 Table S1) (QPBS, 2015).

## 120 2.2 DNDC model

121 The DNDC 9.5 biogeochemical model, which was downloaded from the official web  
122 (<http://www.dndc.sr.unh.edu/>), was employed in this study (Li et al., 2006; Li et al., 1992). The  
123 model has been used widely in more than 20 countries to obtain accurate calibration and  
124 verification results in various ecosystems (Abdalla et al., 2009; Chen et al., 2015;  
125 Kariyapperuma et al., 2011; Li et al., 1996; Li et al., 2017; Li et al., 2014; Liu et al., 2006; Xu  
126 et al., 2003; Zhang and Niu, 2016; Zhao et al., 2016).

127 The model has two components. The first component can simulate the soil environmental  
128 conditions, where it includes soil climate, vegetation growth, and decomposition submodels.  
129 The second component includes three submodels for simulating nitrification, denitrification,  
130 and fermentation processes, which are used to simulate biogeochemical production,  
131 consumption, and emissions of CH<sub>4</sub>, N<sub>2</sub>O, NO, and NH<sub>3</sub>, as well as nitrogen losses due to  
132 leaching (Zhang et al., 2015).

133 The DNDC model simulates vegetation growth by tracking photosynthesis, respiration, water  
134 demand, N demand, C allocation, crop yield, and litter production. The model predicts the SOC  
135 dynamics mainly by quantifying the SOC input from crop litter incorporation and manure  
136 amendment, as well as the SOC output through decomposition. More detailed information  
137 about the model was given by Li (1996).

## 138 2.3 Regional database

139 In order to characterize the spatial heterogeneity of natural grasslands in the study area, we  
140 collected the following geospatial data as inputs for the DNDC biogeochemical model:  
141 grassland type and spatial distribution (Fig. 1), soil properties, and climate data.

### 142 Grassland Database

143 The vegetation parameters in the model were obtained from a grassland field monitoring project  
144 implemented during 2005–2014 (ERSMC-a, 2016; ERSMC-b, 2016). This annual monitoring  
145 project covered the major types of grassland within the project area. On average, 168  
146 monitoring sites were sampled each year. For each monitoring site, the average value based on

删除的内容: major

删除的内容: , net ecosystem exchanges of CO<sub>2</sub>

删除的内容: carbon and

150 3 replicate sampling points was calculated to determine the aboveground biomass value for the  
151 monitoring site. The aboveground biomass harvests used the quadrat method during the plant  
152 growing season (July 10–August 20) in a 1 m × 1 m plot. A more detailed description of the  
153 sampling method used to obtain the observation data can be found in reports by the Ecological  
154 Environment Remote Sensing Monitoring Center of Qinghai Province (ERSMC-a, 2016;  
155 ERSMC-b, 2016). The grassland simulation based on the grassland functional group type was  
156 categorized according to the grassland type map for the study area (Fig. 1). The detailed  
157 grassland parameters used in the model were shown in Supplementary Table S4.

删除的内容: six

删除的内容: S2

#### 158 **Soil Database**

159 We used a 1:1,000,000 scale soil database developed by the Institute of Soil Science, Chinese  
160 Academy of Sciences, which was compiled based on the second national soil survey conducted  
161 in 1979–1994 for all the counties in China (Shi et al., 2004). The database had three attributes:  
162 locations, soil attributes, and reference systems. It contained multi-layer soil properties (e.g.  
163 organic matter, pH, and bulk density), soil texture (e.g. sand, silt and clay proportions), and  
164 spatial information (Shi et al., 2004; Yu et al., 2007a; Yu et al., 2007b), which were used in the  
165 model simulations.

#### 166 **Climate Database**

167 Daily climate data were obtained from the China Meteorological Network for the study period,  
168 and there were 39 stations inside the study areas (<http://data.cma.cn/>). The daily precipitation  
169 and maximum/minimum temperatures between 1985–2014 were interpolated at 1-km  
170 resolution grid for our model. Regression kriging and the inverse distance method were  
171 employed for air temperature and precipitation interpolation, respectively (Fortin and Dale,  
172 2005; Hengl et al., 2007).

#### 173 **Model implementation**

174 All datasets were processed with ArcGIS version 10.2 (ESRI, Redlands, CA) to the formation  
175 a georeferenced DNDC regional simulation database. The data processing flowchart could be  
176 found in the supplementary Fig. S1. The county boundary data were overlaid on grassland type  
177 maps to form the model simulation unit. Then county-based grazing intensity, soil properties,

180 ~~and climate information were assigned to the model simulation units.~~ The DNDC was running  
181 with regional simulation database based on individual model simulation units. The detailed  
182 information of how to run the model could be found in Li (2012). The actual climate, soil,  
183 grassland type and grazing intensity as the simulation baseline.

删除的内容: The county boundary data intersected with grassland type map to formation the model simulation unit, meanwhile, the county based grazing intensity, soil properties and climate information also assigned to the model simulation units

## 184 2.4 Simulation scenarios

### 185 Grazing simulation scenarios

186 The grazing period is all-year round and cattle (90% yaks), sheep, and goats are major livestock  
187 types, while horses are a minor component in the study area. The grazing intensity data were  
188 based on the annual national livestock statistical report provided by the National Bureau of  
189 Statistics of China and the Bureau of Statistics for Qinghai Province. The detailed grazing data  
190 are shown in Supplementary Table S3. In the DNDC model, grazing activity is defined by  
191 specifying the grazing parameters, including the livestock type, grazing period, and grazing  
192 intensity. The detailed parameters for ~~simulating grass growth~~ are shown in Supplementary  
193 Table S4. The grazing intensity is defined according to Eq. 1 based on the grazing area in each  
194 administrative region (Li et al., 2014):

删除的内容: the DNDC grazing model

$$GI = LP/GA, \quad (Eq.1)$$

195 where GI is the grazing intensity ( $\text{head ha}^{-1}$ ), LP is the livestock unit (head), and GA is the  
196 grazing area (ha).

197 In order to test the responses of the grassland biomass and soil SOC to various grazing  
198 intensities, we tested the following treatments: baseline, grazing intensity based on the actual  
199 grazing intensity in 2005;  $G_0$ , grazing intensity of zero;  $G_{-50}$ , 50% of the baseline intensity; and  
200  $G_{+50}$ , 50% higher than the baseline.

### 201 Climate change scenarios

202 The Intergovernmental Panel on Climate Change (IPCC) Fifth Report employed new stable  
203 concentration-based scenarios in representative concentration pathways (RCPs) to project  
204 future climate change (IPCC, 2013). The development of the RCP scenarios used a parallel  
205 method, which combined climate, air, and the carbon cycle with emissions and the socio-  
206 economic situation to assess the impact of climate change on a study area, as well as adaptation,

213 vulnerability, and mitigation analysis (Moss et al., 2010). The RCPs were named according to  
214 their 2100 radiative forcing level and reported by individual modeling teams, i.e., 2.6–8.5 W/m<sup>2</sup>.  
215 The RCPs comprise four scenarios, i.e., RCP2.6, RCP4.5, RCP6.0, and RCP8.5 (Moss et al.,  
216 2010). Each scenario provides a path affected by social and economic conditions and climate,  
217 and each projection corresponds to the radiation force value predicted by 2100.

218 We considered RCP4.5 and RCP8.5 because these two scenarios have been used widely to  
219 evaluate the potential impact of climate change on the environment (Di Vittorio et al., 2014; Li  
220 et al., 2015; van Vuuren et al., 2011; Zhang et al., 2013). RCP4.5 represents a medium-low RCP  
221 with stabilization of CO<sub>2</sub> emissions from 2150 onwards, and RCP8.5 represents a high RCP  
222 with stabilizing CO<sub>2</sub> emissions post-2100 (Meinshausen et al., 2011). The projected climate  
223 conditions in the present study under RCP4.5 and RCP8.5 were derived from the average values  
224 of 25 Coupled Model Intercomparison Project Phase 5 (CMIP5) global climate models (Fu and  
225 Feng, 2014).

226 Compared with 2014, the average temperature and precipitation increased by 0.72°C and  
227 0.80°C, and by 11.81 mm and 12.50 mm under RCP4.5 and RCP8.5 in 2044, respectively, in  
228 the study area (Table 1). The changes in the spatial distribution of precipitation are shown in  
229 Supplementary Fig. S2. The pattern of increased precipitation was similar using RCP4.5 and  
230 RCP8.5 for the period of 2014–2044, where it increased in the whole area and it increased  
231 gradually from the north to the south of the study area. However, RCP8.5 obtained a higher  
232 increase than RCP4.5 and the southwest part of the research area is projected to have a higher  
233 temperature increase than the other regions. Moreover, the annual average temperature had a  
234 similar distribution under the two climate change scenarios, where the temperature increase  
235 using RCP4.5 (Supplementary Fig. S2c) was lower than that with RCP8.5 (Supplementary Fig.  
236 S2d).

237 Three different periods were considered in the grassland simulations. First, a pretreatment  
238 (1961–1984) period was used to initialize the soil climate conditions and SOC composition.  
239 The pretreatment period represented the baseline climate with no increases in CO<sub>2</sub> or climate  
240 change. The second period represented realistic climate scenarios (1985–2014) based on the  
241 most recent climate. The third period comprised future climate scenarios (2015–2044), which  
242 represented two future climates (RCP4.5, RCP8.5) scenarios with changes in temperature and



243 precipitation. [The future climate database between 2015 to 2044 was obtained through add the](#)  
244 [projected future climate change to the daily temperature and precipitation in 2014.](#)

## 245 **2.5 Model validation and sensitivity test**

246 The root mean squared error (RMSE) (Eq.2), coefficient of determination ( $R^2$ ) (Eq.3) and model  
247 efficiency (ME) (Eq.4) were employed for model validation. The RMSE estimates the scatter  
248 between the simulated and measured data, where values close to zero indicate excellent  
249 agreement and hence the good performance of the model (Araya et al., 2015).  $R^2$  is used to test  
250 the agreement between the modeled results and observations, where a value closer to 1 indicates  
251 that the model provides a better explanation for the observed values (Willmott, 1982). The  
252 positive ME value indicates that the model prediction is better than the mean of observations,  
253 and the best model performance has ME value equal to 1 (Miehle, 2006). RMSE,  $R^2$  and ME  
254 were calculated as follows:

$$\text{RMSE} = \sqrt{\frac{\sum_{i=1}^n (P_i - O_i)^2}{n}} \quad (\text{Eq. 2})$$

$$R^2 = \left[ \frac{\sum_{i=1}^n (O_i - \bar{O})(P_i - \bar{P})}{\sqrt{\sum_{i=1}^n (O_i - \bar{O})^2} \sqrt{\sum_{i=1}^n (P_i - \bar{P})^2}} \right]^2, \quad (\text{Eq. 3})$$

$$\text{ME} = 1 - \frac{\sum_{i=1}^n (P_i - O_i)^2}{\sum_{i=1}^n (O_i - \bar{O})^2} \quad (\text{Eq. 4})$$

255 where  $P_i$  and  $O_i$  were modeled and observed values, and  $\bar{P}$  and  $\bar{O}$  are their averages.  $n$  is the  
256 number of values.

257 The validation dataset included more than 1400 grassland biomass sampling points, which  
258 covered the whole of the study area, and the field measurements were also fully representative  
259 of the major grassland types in this area. In addition, 46 SOC observation points were sampled  
260 between 2011–2012, which were randomly distributed among all of the simulation units  
261 (county and grassland types). Maximum biomass in each quadrat was harvested and dried in an  
262 oven at 70 °C for 72 h, weighed and ground for analysis. The soil of 0–30 cm depth was sampled  
263 at 10-cm intervals with a soil drill (metal cylinder: diameter of 5 cm, length of 20 cm and the  
264 total length of the sampler 1.3 m). 3 samples were collected in each replication plot. The ground  
265 soil samples passed a 0.15-mm sieve and wet oxidation method was applied to determine SOC

删除的内容: The grassland biomass was sampled in quadrat (1 m × 1 m) with 3 replicates between mid-July and mid-August

269 (Mebius, 1960). In general, every simulation unit had 1–2 validation points (ERSMC-a, 2016).  
270 A series of sensitivity tests were conducted to investigate the responses of the DNDC to  
271 variation in climate factors (air temperature, precipitation) and grazing intensity. DNDC was  
272 run with a 55-year baseline scenario that was based on the actual climate, soil and grazing  
273 conditions of year 2005 in the study area. The ranges of values for alternative scenarios were  
274 ±10, ±20 and ±30% for precipitation, ±1, ±2 and ±3 °C for air temperature and ±20, ±40, ±60,  
275 ±80 and ±100% for grazing intensity, respectively.

删除的内容:

## 276 2.6 Statistical analysis

277 Two-way analysis of variance (ANOVA) was used to test the effects of climate and grazing  
278 intensity on both the biomass and SOC according to the simulated results. Mean values for the  
279 same treatments were compared using Fisher's least significant difference (LSD) test with one-  
280 way ANOVA at  $P = 0.05$ . The statistical analyses, including the test for normality (Shapiro-  
281 Wilk) and homogeneity of variance (Levene), were performed using Origin 2016 version  
282 b9.3.1.273 (OriginLab Corporation, MA, USA), and the multiple regression analysis was  
283 conducted with the Minitab version 17 (Minitab Inc., State College, PA, USA).

## 284 3 Results

### 285 3.1 Model validation

286 The biomass simulation showed that the modeled total biomass was in good agreement with  
287 the observations (Fig. 2). There was a significant linear relationship ( $P < 0.001$ ) between the  
288 measurements and the modeled above ground biomass ( $R^2=0.71$ ,  $ME=0.75$ ,  $RMSE = 93.11$  g  
289  $C\ m^{-2}$ ;  $P < 0.001$ ). The simulated SOC concentrations were in good agreement with the  
290 measured data (Fig. 3). The calculated statistical indices indicated that the modeled SOC  
291 concentrations were closely correlated with the measured data ( $R^2 = 0.73$ ,  $ME=0.69$ ,  $RMSE =$   
292  $21.51$  g C  $kg^{-1}$ ;  $P < 0.001$ ).

删除的内容: total

## 295 3.2 Sensitivity analysis

296 In the sensitivity analysis simulation, increases in precipitation resulted in elevated biomass and  
297 SOC, however, the SOC was changed slightly compared to the biomass (Fig. 4A, B);  
298 Temperature decrease induced the biomass decrease, and temperature increase could increase  
299 the biomass. However, biomass change did not follow a simple linear relationship with change  
300 in temperature. The 1°C temperature increase could bring 24% of biomass increase, meanwhile,  
301 1°C temperature decrease could decrease 13% biomass (Fig. 4A). Biomass was not susceptible  
302 to the changes in precipitation. The biomass increased 7% and decreased 6% with precipitation  
303 increased and decreased 30%, respectively. SOC had the reverse trend with increased or  
304 decreased temperature, but there was a more complex relationship with temperature change.  
305 The SOC had less sensitivity to temperature change compared to biomass. With a 1 °C  
306 temperature increase, the SOC increased slightly with 0.26%, but when temperature increased  
307 over 2 °C, the SOC decreased 0.26–0.83% (Fig. 4B). The modeled biomass was sensitive to  
308 grazing intensity and biomass had a reverse trend with increased or decreased grazing intensity  
309 (Fig. 4A). When grazing intensity changed from -100 to 100%, SOC increased rate from -0.22  
310 to 0.40% (Fig. 4B).

## 311 3.3 Impact of grazing on biomass and SOC

312 The biomass and SOC were significantly affected by climate change and the grazing intensity.  
313 However, there were no significant interaction effects between climate and grazing intensity on  
314 biomass and SOC during 1985–2044 throughout the study area (Table 2).  
315 Under the same climate scenario, the grazing intensity change could significantly influence the  
316 biomass, which had a negative relationship with the grazing intensity. The biomass differed  
317 significantly under the four grazing intensities in the three climate scenarios. Among the  
318 grazing intensity treatments, the biomass followed the order of: G0 > G-50 > baseline > G+50  
319 (Table 3). Compared with the treatment without grazing, the grazing scenarios induced similar  
320 changes in the biomass among the different grazing intensity treatments.  
321 Grazing could increase the SOC storage. The SOC levels under various grazing intensities

删除的内容: A series of sensitivity tests were conducted to investigate the responses of the DNDC to variation in climate factors (air temperature, precipitation) and grazing intensity. DNDC was run with a 55-year baseline scenario that was based on the actual climate, soil and grazing conditions of year 2005 in the study area. The ranges of values for alternative scenarios were  $\pm 10$ ,  $\pm 20$  and  $\pm 30\%$  for precipitation,  $\pm 1$ ,  $\pm 2$  and  $\pm 3$  °C for air temperature and  $\pm 20$ ,  $\pm 40$ ,  $\pm 60$ ,  $\pm 80$  and  $\pm 100\%$  for grazing intensity, respectively.

删除的内容: . The sensitivity analysis demonstrated that the DNDC model was sensitive to precipitation and temperature change and was useful for studying the biomass and SOC under the grazing intensity change

335 followed the order of:  $G_0 < G_{-50} < \text{baseline} < G_{+50}$  (Table 3).  $G_0$  had the lowest SOC whereas  
336  $G_{+50}$  had the highest SOC under all the climate scenarios. Under the same climate scenario, a  
337 reduction in the grazing intensity from the baseline could significantly decrease the SOC  
338 concentration, but there was no significant change in the SOC when the grazing intensity  
339 increased by 50% compared with the baseline.

删除的内容: 4

### 340 3.4 Impact of climate change on biomass and SOC

341 The biomass exhibited a significant decreasing trend in the future climate scenarios compared  
342 with the past 30 years under all the grazing intensities (Fig. 5), although precipitation increased  
343 under both RCP4.5 and RCP8.5 (Table 1). Moreover, with the same grazing intensity, the  
344 biomass was lower in RCP8.5 compared with RCP4.5. However, the biomass did not differ  
345 significantly between RCP4.5 and RCP8.5 under the same grazing intensity (Table 3). This  
346 suggests that RCP8.5 had a more negative effect on the biomass compared with RCP4.5 (Fig.  
347 5).

348 The future climate could significantly decrease the SOC, and RCP8.5 had a more negative effect  
349 than the RCP4.5 on the SOC. SOC exhibited a continuously decreasing trend according to the  
350 RCP4.5 and RCP8.5 projections in the research area, where the changes in the SOC were similar  
351 under the different grazing treatments (Fig. 6). A similar trend also occurred between 1985–  
352 2014. The SOC was lower under RCP8.5 compared with that under RCP4.5 at all of the grazing  
353 intensities. However, there were no significant differences between RCP4.5 and RCP8.5 (Table  
354 3).

删除的内容: 4

### 355 3.5 The relationship between SOC and biomass change with 356 grazing and climate factors

357 A multiple linear regression analysis was adopted to each simulation unit to analyze the  
358 relationship between the annual changed biomass and SOC with corresponding temperature,  
359 precipitation and grazing intensity. The regression analysis indicated precipitation, air  
360 temperature and combined with grazing intensity, can explain 33.2% of changes in biomass

删除的内容: A multiple linear regression analysis was adopted to each simulation unit to analyze the relationship between the annual change of biomass and SOC with corresponding temperature, precipitation and grazing intensity

删除的内容: A multiple linear

369 under the realistic climate scenarios with a linear model. Meanwhile, precipitation, air  
370 temperature, and grazing intensity can explain 52.3% of SOC variation (Table 4). Taking into  
371 account the prediction sum of squares (PRESS) value, air temperature is the factor contributing  
372 most of variations in biomass and SOC. It's suggested that precipitation and grazing intensity  
373 have lower contributes to biomass and SOC change in study region during past thirty years  
374 compared to temperature.

删除的内容: 5

删除的内容: air temperature is the best predictor factor for biomass and SOC

删除的内容: with

### 375 **3.6 Patterns of regional change in the biomass and SOC**

已移动(插入) [1]

376 From a spatiotemporal distribution perspective, the distribution of grassland biomass in  
377 Qinghai Province is rather distinct due to the different constraints imposed by water and the  
378 cumulative temperature. The biomass increased in the central and southwest of the research  
379 region but decreased in the eastern and northern regions under RCP4.5 and RCP8.5,  
380 respectively. However, the grassland biomass tended to decrease in more regions rather than  
381 exhibiting an increasing trend (Fig. 7A). In particular, the vegetation activities are mainly  
382 controlled by temperature in the eastern region, which may lead to greater negative effects than  
383 the positive effects of increased precipitation (Zhou et al., 2007); therefore, the average regional  
384 biomass may exhibit a significant decreasing trend.  
385 In general, the SOC decreased from the low-temperature region to the high-temperature region,  
386 where it followed the temperature distribution pattern in Qinghai Province and decreased from  
387 the south to the north (Fig. 7B). The cold weather conditions would limit decomposition process  
388 and there would be greater carbon storage over the years with accumulation in this area.  
389 Furthermore, on the regional scale, although the SOC exhibited a decreasing trend in the whole  
390 study area, the rate of change differed with a significant spatial distribution pattern.

删除的内容: .

## 391 **4 Discussion**

### 392 **4.1 Effects of climate change on biomass and SOC**

393 Climate change is the main driver of the inter-annual fluctuations in the grassland biomass, as

399 observed in previous studies by Fan et al. (2010) and Gao et al. (2016). The unique climate  
400 conditions such as precipitation and temperature on the QTP have a significant impact on the  
401 grassland biomass (Fan et al., 2010; Yan et al., 2015). According to this study, the biomass of  
402 alpine grassland could increase significantly in the short term as the temperature increases (Fig.  
403 4), as also suggested by Chen et al. (2013) and Gao et al. (2016). However, under long-term  
404 constant warming and without considering other meteorological factors, the alpine grassland  
405 biomass will probably decrease (Zhu et al., 2016). This may be due to the higher temperature  
406 increasing evaporation in the study area, thereby overcoming the benefits of increased  
407 precipitation (Xu et al., 2009). The shortage of water will ultimately limit the increase in the  
408 grassland biomass with significant warming and drying.

409 The decline of the SOC in our study indicates that climate warming will have more negative  
410 effects and eliminated the positive effect of precipitation increasing in the study area. Riedo et  
411 al. (2000) indicated that carbon storage may be lost from grazed grassland as the temperature  
412 and precipitation increase. Tan et al. (2010) suggested that after a 2°C increase in temperature  
413 in the QTP, the grassland ecosystem's net primary productivity will increase by 9%, but the  
414 SOC will decrease by 10%. Temperature and precipitation are the main factors that affect the  
415 SOC pools (Jobbagy and Jackson, 2000). Many studies have shown that sustained warming will  
416 lead to increases in the SOC decomposition rate (Tan et al., 2010; Xu et al., 2012), especially  
417 in the QTP region with high carbon storage at a low temperature in the high latitudes. Thus, the  
418 SOC could be released by climate warming and become a more obvious carbon source  
419 (Kirschbaum, 1995; Kvenvolden, 1993; Qin et al., 2014; Wang et al., 2008; Yang et al., 2008).  
420 However, the effects of warming and precipitation on SOC storage remain a relatively complex  
421 problem (Cao and Woodward, 1998; Schuur, 2003).

## 422 **4.2 Effects of grazing intensity on biomass and SOC**

423 The grazing intensity is most importance for the outcomes of grazing and it is the main external  
424 factor that controls the grassland vegetation dynamics, as reported in the previous studies  
425 (Guevara et al., 1996; McIntire and Hik, 2005; Pei et al., 2008; Veen et al., 2012; Zeng et al.,  
426 2015). Indeed, an increase in the grazing intensity implies that more plants would be removed

删除的内容: influence of the

428 by animals, which could eventually lead to a decline in the aboveground biomass of the  
429 grassland (Yan et al., 2013).

430 Small differences in the SOC concentrations were observed after the grazing intensity increased.  
431 However, there was a positive correlation between the grazing intensity and SOC. There is a  
432 lack of consistent conclusions regarding the impact of grazing on the SOC concentration  
433 according to previous studies. Thus, some studies showed that the grazing intensity and SOC  
434 had a negative correlation (Bagchi and Ritchie, 2010; Derner et al., 1997; Wu et al., 2009) or  
435 no relationship (Holt, 1997; Milchunas and Lauenroth, 1993). By contrast, many other studies  
436 showed that grazing can increase the SOC (Li et al., 2011; Schuman et al., 1999; Wienhold et  
437 al., 2001). This is partly because moderate grazing can increase the grassland below-ground  
438 biomass, which is beneficial for the accumulation of SOC (López-Mársico et al., 2015). Some  
439 studies have shown that increasing the plant root/shoot ratio and allocating more carbon to the  
440 root system could induce SOC increase (Derner et al., 1997). Nevertheless, the main reason for  
441 the increase in the SOC in our study was the increasing number of grazing animals, and thus  
442 the increased amount of manure returned after grazing on grassland (Hu et al., 2015).  
443 Furthermore, the fertilizing effects of livestock excrement can increase the SOC (Conant et al.,  
444 2001), especially in alpine grassland where the low temperature leads to the relatively slow  
445 decomposition of litter (Davidson and Janssens, 2006). Moreover, increases in the effects of  
446 hoof activity can accelerate the decomposition of litter and decaying roots, and improve the  
447 contact with the soil, thereby accelerating the transfer of carbon to the soil to increase the SOC  
448 concentration (Luo et al., 2010; Naeth et al., 1991).

### 449 4.3

## 452 4.4 Uncertainty analysis

453 Models are ideal tools for assessing the details of environment processes under various grazing  
454 intensity. Furthermore, they can provide projections regarding the variations in grassland

删除的内容: with

删除的内容: different increases in the SOC

删除的内容: improve

已上移 [1]: **Patterns of regional change in the biomass and SOC**

From a spatiotemporal distribution perspective, the distribution of grassland biomass in Qinghai Province is rather distinct due to the different constraints imposed by water and the cumulative temperature. The biomass increased in the central and southwest of the research region but decreased in the eastern and northern regions under RCP4.5 and RCP8.5, respectively. However, the grassland biomass tended to decrease in more regions rather than exhibiting an increasing trend (Fig. 7A). In particular, the vegetation activities are mainly controlled by temperature in the eastern region, which may lead to greater negative effects than the positive effects of increased precipitation (Zhou et al., 2007); therefore, the average regional biomass may exhibit a significant decreasing trend.

In general, the SOC decreased from the low-temperature region to the high-temperature region, where it followed the temperature distribution pattern in Qinghai Province and decreased from the south to the north (Fig. 7B). The cold weather conditions would limit decomposition process and there would be greater carbon storage over the years with accumulation in this area. Furthermore, on the regional scale, although the SOC exhibited a decreasing trend in the whole study area, the rate of change differed with a significant spatial distribution pattern.

485 biomass and SOC under alternative climate change scenarios. However, the uncertainty of the  
486 data sources ~~could~~ be incorporated into the model outputs. The CMIP5 RCP scenarios were  
487 used to provide the possible changes in climate in this study, but as a long-term climate  
488 projection, the uncertainty of the projected climate will increase ~~with time span increase~~ (Moss  
489 et al., 2010). The precipitation seasonal distribution pattern is critical to grassland growth (Shen  
490 et al., 2011). In the present study, the precipitation distribution pattern of RCP scenarios was  
491 derived from the year of 2014; this assumption may ~~cause uncertainty for long-term study~~.  
492 ~~In the present study, we assumed that the grassland type was the same in the scenarios. As the~~  
493 ~~grassland community structure could be altered under both grazing and climate change~~  
494 ~~(Koerner and Collins, 2014). Therefore, the assumption of grassland community structure keeps~~  
495 ~~stable in the simulation could induce the uncertainty~~. Due to a lack of ~~mechanisms~~ regarding  
496 the response of grassland soil to animal trampling in the DNDC model, we ignored the  
497 trampling effect of the animals on the soil structure, which may have led to some errors in the  
498 results.

499 The grazing rate can be another potential source of uncertainty. In most of the natural grassland  
500 regions of the QTP, transhumance is usually practiced, which requires the transfer of livestock  
501 from one pasture to another during different seasons, and staying in the same pasture for the  
502 whole season. However, this grassland management practice was simplified in the present study  
503 because we could not find specific statistical data to address this issue. Thus, we assumed that  
504 livestock stayed in the same pasture for the whole year with 24 h d<sup>-1</sup> of grazing and the stocking  
505 rates were the same throughout the simulation unit and without yak dung remove (Zhang et al.,  
506 2016). Furthermore, we assumed that all grasslands were useable. These assumptions could  
507 have induced ~~uncertainties in the simulation results~~.

## 508 5 Conclusions

509 In this study, we used the DNDC model to study the grassland biomass and SOC dynamics  
510 under different climate change and grazing management scenarios. We found that the biomass  
511 and SOC were significantly affected by climate change and grazing intensity. In the long term,  
512 the total grassland biomass had a negative relationship and the SOC had a positive relationship

删除的内容: should

删除的内容: the

删除的内容: incorporate

删除的内容:

删除的内容: . . .

The grazing rate can be another potential source of

删除的内容: data

删除的内容: slight



521 with the grazing intensity. The total biomass exhibited interannual fluctuations in the time series  
522 and the SOC had a declining trend. All of the grazing scenarios obtained similar patterns of  
523 change compared with the baseline scenario.

524 Future climate change could induce great uncertainty in the grassland dynamics. The total  
525 grassland biomass and average SOC in the study area were reduced significantly under both the  
526 RCP4.5 and RCP8.5 future climate change scenarios. However, there were significant  
527 differences in the spatial distribution of the changing trends in the biomass and SOC. In the  
528 eastern and northern regions of the study area, the biomass decreased, whereas it exhibited an  
529 increasing trend in the southwest part of the research area. On a regional scale, the change in  
530 the SOC had a significant spatial distribution pattern where it decreased from the south to the  
531 north.

532 The grassland biomass and SOC will decline under sustained warming according to future  
533 climate change projections. Therefore, grassland management should be adapted to potential  
534 climate change to ensure sustainable grassland development in the study area. In the future,  
535 suitable grazing intensity for the sustainable development of grasslands should be studied.  
536 Moreover, greater human activity and management practices should be coupled according to  
537 the model to develop more intelligent grassland management strategies.

538

#### 539 **Acknowledgments**

540 We thank editors and four anonymous reviewers for their valuable comments and suggestions  
541 on the manuscript. This study was supported by the National Natural Science Foundation of  
542 China (Nos. 31672472 and [31770480](#)), National Key Project of Scientific and Technical  
543 Supporting Programs (2014CB138706), and Program for Changjiang Scholars and Innovative  
544 Research Team in University (IRT17R50). We are grateful to the grassland station in Qinghai  
545 province for providing data about the grassland biomass and livestock numbers in each county.

546

#### 547 **References**

548 Abdalla, M., Wattenbach, M., Smith, P., Ambus, P., Jones, M., and Williams, M.: Application of the  
549 DNDC model to predict emissions of N<sub>2</sub>O from Irish agriculture, *Geoderma*, 151, 327-337, 2009.  
550 Araya, A., Hoogenboom, G., Luedeling, E., Hadgu, K. M., Kisekka, I., and Martorano, L. G.: Assessment

删除的内容: 31200335

552 of maize growth and yield using crop models under present and future climate in southwestern Ethiopia,  
553 *Agricultural and Forest Meteorology*, 214–215, 252-265, 2015.

554 Bagchi, S. and Ritchie, M. E.: Introduced grazers can restrict potential soil carbon sequestration through  
555 impacts on plant community composition, *Ecology Letters*, 13, 959-968, 2010.

556 Cao, M. and Woodward, F. I.: Dynamic responses of terrestrial ecosystem carbon cycling to global  
557 climate change, *Nature*, 393, 249-252, 1998.

558 Chen, H., Zhao, Y., Feng, H., Li, H., and Sun, B.: Assessment of climate change impacts on soil organic  
559 carbon and crop yield based on long-term fertilization applications in Loess Plateau, China, *Plant and*  
560 *Soil*, 390, 401-417, 2015.

561 Chen, H., Zhu, Q., Peng, C., Wu, N., Wang, Y., Fang, X., Gao, Y., Zhu, D., Yang, G., Tian, J., Kang, X.,  
562 Piao, S., Ouyang, H., Xiang, W., Luo, Z., Jiang, H., Song, X., Zhang, Y., Yu, G., Zhao, X., Gong, P., Yao,  
563 T., and Wu, J.: The impacts of climate change and human activities on biogeochemical cycles on the  
564 Qinghai-Tibetan Plateau, *Global Change Biology*, 19, 2940-2955, 2013.

565 Conant, R. T., Paustian, K., and Elliott, E. T.: Grassland management and conversion into grassland:  
566 Effects on soil carbon, *Ecological Applications*, 11, 343-355, 2001.

567 Davidson, E. A. and Janssens, I. A.: Temperature sensitivity of soil carbon decomposition and feedbacks  
568 to climate change, *Nature*, 440, 165-173, 2006.

569 Derner, J. D., Briske, D. D., and Boutton, T. W.: Does grazing mediate soil carbon and nitrogen  
570 accumulation beneath C-4, perennial grasses along an environmental gradient?, *Plant and Soil*, 191, 147-  
571 156, 1997.

572 Di Vittorio, A. V., Chini, L. P., Bond-Lamberty, B., Mao, J., Shi, X., Truesdale, J., Craig, A., Calvin, K.,  
573 Jones, A., Collins, W. D., Edmonds, J., Hurtt, G. C., Thornton, P., and Thomson, A.: From land use to  
574 land cover: restoring the afforestation signal in a coupled integrated assessment-earth system model and  
575 the implications for CMIP5 RCP simulations, *Biogeosciences*, 11, 6435-6450, 2014.

576 Du, M. Y., Kawashima, S., Yonemura, S., Zhang, X. Z., and Chen, S. B.: Mutual influence between  
577 human activities and climate change in the Tibetan Plateau during recent years, *Global and Planetary*  
578 *Change*, 41, 241-249, 2004.

579 Ellis, E. C. and Ramankutty, N.: Putting people in the map: anthropogenic biomes of the world, *Frontiers*  
580 *in Ecology and the Environment*, 6, 439-447, 2008.

581 ERSMC-a: <http://www.sanjiangyuan.org.cn/>, last access: 8/12 2016.

582 ERSMC-b: <http://deep.qherc.org/>, last access: 8/12 2016.

583 Fan, J.-W., Shao, Q.-Q., Liu, J.-Y., Wang, J.-B., Harris, W., Chen, Z.-Q., Zhong, H.-P., Xu, X.-L., and  
584 Liu, R.-G.: Assessment of effects of climate change and grazing activity on grassland yield in the Three  
585 Rivers Headwaters Region of Qinghai-Tibet Plateau, China, *Environmental Monitoring and Assessment*,  
586 170, 571-584, 2010.

587 Fortin, M. J. and Dale, M. R. T.: *Spatial Analysis: A Guide for Ecologists*, Cambridge University Press,  
588 2005.

589 Fu, Q. and Feng, S.: Responses of terrestrial aridity to global warming, *Journal of Geophysical Research:*  
590 *Atmospheres*, 119, 7863-7875, 2014.

591 Gao, Q., Guo, Y., Xu, H., Ganjurjav, H., Li, Y., Wan, Y., Qin, X., Ma, X., and Liu, S.: Climate change  
592 and its impacts on vegetation distribution and net primary productivity of the alpine ecosystem in the  
593 Qinghai-Tibetan Plateau, *Science of the Total Environment*, 554, 34-41, 2016.

594 Gao, Q.-z., Wan, Y.-f., Xu, H.-m., Li, Y., Jiangcun, W.-z., and Borjigidai, A.: Alpine grassland  
595 degradation index and its response to recent climate variability in Northern Tibet, China, *Quaternary*

596 International, 226, 143-150, 2010.

597 Guevara, J. C., Stasi, C. R., and Estevez, O. R.: Effect of cattle grazing on range perennial grasses in the  
598 Mendoza plain, Argentina, *Journal of Arid Environments*, 34, 205-213, 1996.

599 Harris, R. B.: Rangeland degradation on the Qinghai-Tibetan plateau: A review of the evidence of its  
600 magnitude and causes, *Journal of Arid Environments*, 74, 1-12, 2010.

601 Hengl, T., Heuvelink, G. B. M., and Rossiter, D. G.: About regression-kriging: From equations to case  
602 studies, *Computers & Geosciences*, 33, 1301-1315, 2007.

603 Holt, J. A.: Grazing pressure and soil carbon, microbial biomass and enzyme activities in semi-arid  
604 northeastern Australia, *Applied Soil Ecology*, 5, 143-149, 1997.

605 Hu, Z., Li, S., Guo, Q., Niu, S., He, N., Li, L., and Yu, G.: A synthesis of the effect of grazing exclusion  
606 on carbon dynamics in grasslands in China, *Global Change Biology*, doi: 10.1111/gcb.13133, 2015. n/a-  
607 n/a, 2015.

608 IPCC: Climate Change 2013: The Physical Science Basis. Contribution of Working Group I to the Fifth  
609 Assessment Report of the Intergovernmental Panel on Climate Change, Cambridge University Press,  
610 Cambridge, United Kingdom and New York, NY, USA, 2013.

611 Jobbagy, E. G. and Jackson, R. B.: The vertical distribution of soil organic carbon and its relation to  
612 climate and vegetation, *Ecological Applications*, 10, 423-436, 2000.

613 Kariyapperuma, K. A., Wagner-Riddle, C., Furon, A. C., and Li, C.: Assessing Spring Thaw Nitrous  
614 Oxide Fluxes Simulated by the DNDC Model for Agricultural Soils, *Soil Science Society of America  
615 Journal*, 75, 678-690, 2011.

616 Kirschbaum, M. U. F.: THE TEMPERATURE-DEPENDENCE OF SOIL ORGANIC-MATTER  
617 DECOMPOSITION, AND THE EFFECT OF GLOBAL WARMING ON SOIL ORGANIC-C  
618 STORAGE, *Soil Biology & Biochemistry*, 27, 753-760, 1995.

619 Klein, J. A., Harte, J., and Zhao, X.-Q.: Experimental warming, not grazing, decreases rangeland quality  
620 on the Tibetan Plateau, *Ecological Applications*, 17, 541-557, 2007.

621 Koerner, S. E. and Collins, S. L.: Interactive effects of grazing, drought, and fire on grassland plant  
622 communities in North America and South Africa, *Ecology*, 95, 98-109, 2014.

623 Kvenvolden, K. A.: Gas hydrates—geological perspective and global change, *Reviews of Geophysics*,  
624 31, 173-187, 1993.

625 Lavado, R. S., Sierra, J. O., and Hashimoto, P. N.: Impact of grazing on soil nutrients in a Pampean  
626 grassland, *Journal of Range Management*, 49, 452-457, 1996.

627 Lehnert, L. W., Wesche, K., Trachte, K., Reudenbach, C., and Bendix, J.: Climate variability rather than  
628 overstocking causes recent large scale cover changes of Tibetan pastures, 6, 24367, 2016.

629 Li, C.: The DNDC Model. In: *Evaluation of Soil Organic Matter Models: Using Existing Long-Term  
630 Datasets*, Powlson, D. S., Smith, P., and Smith, J. U. (Eds.), Springer Berlin Heidelberg, Berlin,  
631 Heidelberg, 1996.

632 Li, C.: *User's Guide for the DNDC Model*. 2012.

633 Li, C. S., Farahbakhshzad, N., Jaynes, D. B., Dinnes, D. L., Salas, W., and McLaughlin, D.: Modeling  
634 nitrate leaching with a biogeochemical model modified based on observations in a row-crop field in Iowa,  
635 *Ecological Modelling*, 196, 116-130, 2006.

636 Li, C. S., Frolking, S., and Frolking, T. A.: A MODEL OF NITROUS-OXIDE EVOLUTION FROM  
637 SOIL DRIVEN BY RAINFALL EVENTS .1. MODEL STRUCTURE AND SENSITIVITY, *Journal of  
638 Geophysical Research-Atmospheres*, 97, 9759-9776, 1992.

639 Li, C. S., Narayanan, V., and Harriss, R. C.: Model estimates of nitrous oxide emissions from agricultural

640 lands in the United States, *Global Biogeochemical Cycles*, 10, 297-306, 1996.

641 Li, H., Wang, L., Li, J., Gao, M., Zhang, J., Zhang, J., Qiu, J., Deng, J., Li, C., and Frolking, S.: The  
642 development of China-DNDC and review of its applications for sustaining Chinese agriculture,  
643 *Ecological Modelling*, 348, 1-13, 2017.

644 Li, L., Yang, S., Wang, Z., Zhu, X., and Tang, H.: Evidence of warming and wetting climate over the  
645 Qinghai-Tibet Plateau, Arctic, Antarctic, and Alpine Research, 42, 449-457, 2010.

646 Li, R. H., Li, X. B., Li, G. Q., and Wen, W. Y.: Simulation of soil nitrogen storage of the typical steppe  
647 with the DNDC model: A case study in Inner Mongolia, China, *Ecological Indicators*, 41, 155-164, 2014.

648 Li, S., Lu, S., Gao, Y., and Ao, Y.: The change of climate and terrestrial carbon cycle over Tibetan Plateau  
649 in CMIP5 models, *International Journal of Climatology*, 35, 4359-4369, 2015.

650 Li, W., Huang, H. Z., Zhang, Z. N., and Wu, G. L.: Effects of grazing on the soil properties and C and N  
651 storage in relation to biomass allocation in an alpine meadow, *Journal of Soil Science and Plant Nutrition*,  
652 11, 27-39, 2011.

653 Li, X. L., Gao, J., Brierley, G., Qiao, Y. M., Zhang, J., and Yang, Y. W.: RANGELAND DEGRADATION  
654 ON THE QINGHAI-TIBET PLATEAU: IMPLICATIONS FOR REHABILITATION, *Land Degradation  
655 & Development*, 24, 72-80, 2013a.

656 Li, Y., Dong, S., Wen, L., Wang, X., and Wu, Y.: Assessing the soil quality of alpine grasslands in the  
657 Qinghai-Tibetan Plateau using a modified soil quality index, *Environmental Monitoring and Assessment*,  
658 185, 8011-8022, 2013b.

659 Li, Y., Luo, T., and Lu, Q.: Plant height as a simple predictor of the root to shoot ratio: Evidence from  
660 alpine grasslands on the Tibetan Plateau, *Journal of Vegetation Science*, 19, 245-252, 2008.

661 Li, Z., Huffman, T., McConkey, B., and Townley-Smith, L.: Monitoring and modeling spatial and  
662 temporal patterns of grassland dynamics using time-series MODIS NDVI with climate and stocking data,  
663 *Remote Sensing of Environment*, 138, 232-244, 2013c.

664 Liu, Y., Yu, Z., Chen, J., Zhang, F., Doluschitz, R., and Axmacher, J. C.: Changes of soil organic carbon  
665 in an intensively cultivated agricultural region: A denitrification-decomposition (DNDC) modelling  
666 approach, *Science of The Total Environment*, 372, 203-214, 2006.

667 López-Mársico, L., Altesor, A., Oyarzabal, M., Baldassini, P., and Paruelo, J. M.: Grazing increases  
668 below-ground biomass and net primary production in a temperate grassland, *Plant and Soil*, 392, 155-  
669 162, 2015.

670 Luo, C., Xu, G., Chao, Z., Wang, S., Lin, X., Hu, Y., Zhang, Z., Duan, J., Chang, X., Su, A., Li, Y., Zhao,  
671 X., Du, M., Tang, Y., and Kimball, B.: Effect of warming and grazing on litter mass loss and temperature  
672 sensitivity of litter and dung mass loss on the Tibetan plateau, *Global Change Biology*, 16, 1606-1617,  
673 2010.

674 Maussion, F., Scherer, D., Mölg, T., Collier, E., Curio, J., and Finkelnburg, R.: Precipitation Seasonality  
675 and Variability over the Tibetan Plateau as Resolved by the High Asia Reanalysis, *Journal of Climate*,  
676 27, 1910-1927, 2014.

677 McIntire, E. J. B. and Hik, D. S.: Influences of chronic and current season grazing by collared pikas on  
678 above-ground biomass and species richness in subarctic alpine meadows, *Oecologia*, 145, 288-297, 2005.

679 Mebius, L. J.: A rapid method for the determination of organic carbon in soil, *Analytica Chimica Acta*,  
680 22, 120-124, 1960.

681 Meinshausen, M., Smith, S. J., Calvin, K., Daniel, J. S., Kainuma, M. L. T., Lamarque, J. F., Matsumoto,  
682 K., Montzka, S. A., Raper, S. C. B., Riahi, K., Thomson, A., Velders, G. J. M., and van Vuuren, D. P. P.:  
683 The RCP greenhouse gas concentrations and their extensions from 1765 to 2300, *Climatic Change*, 109,

684 213-241, 2011.

685 Miehle, P.: Quantifying uncertainty from large-scale model predictions of forest carbon dynamics, *Global*  
686 *Change Biology*, 12, 1421-1434, 2006.

687 Milchunas, D. G. and Lauenroth, W. K.: Quantitative Effects of Grazing on Vegetation and Soils over a  
688 Global Range of Environments, *Ecological Monographs*, 63, 327-366, 1993.

689 Moss, R. H., Edmonds, J. A., Hibbard, K. A., Manning, M. R., Rose, S. K., van Vuuren, D. P., Carter, T.  
690 R., Emori, S., Kainuma, M., Kram, T., Meehl, G. A., Mitchell, J. F. B., Nakicenovic, N., Riahi, K., Smith,  
691 S. J., Stouffer, R. J., Thomson, A. M., Weyant, J. P., and Wilbanks, T. J.: The next generation of scenarios  
692 for climate change research and assessment, *Nature*, 463, 747-756, 2010.

693 Naeth, M. A., Bailey, A. W., Pluth, D. J., Chanasyk, D. S., and Hardin, R. T.: GRAZING IMPACTS ON  
694 LITTER AND SOIL ORGANIC-MATTER IN MIXED PRAIRIE AND FESCUE GRASSLAND  
695 ECOSYSTEMS OF ALBERTA, *Journal of Range Management*, 44, 7-12, 1991.

696 Pei, S., Fu, H., and Wan, C.: Changes in soil properties and vegetation following exclosure and grazing  
697 in degraded Alxa desert steppe of Inner Mongolia, China, *Agriculture Ecosystems & Environment*, 124,  
698 33-39, 2008.

699 Pei, Z.-Y., Ouyang, H., Zhou, C.-P., and Xu, X.-L.: Carbon Balance in an Alpine Steppe in the Qinghai-  
700 Tibet Plateau, *J. Integr. Plant Biol.*, 51, 521-526, 2009.

701 Piao, S., Tan, K., Nan, H., Ciais, P., Fang, J., Wang, T., Vuichard, N., and Zhu, B.: Impacts of climate and  
702 CO<sub>2</sub> changes on the vegetation growth and carbon balance of Qinghai-Tibetan grasslands over the past  
703 five decades, *Global and Planetary Change*, 98-99, 73-80, 2012.

704 Qin, Y., Yi, S., Ren, S., Li, N., and Chen, J.: Responses of typical grasslands in a semi-arid basin on the  
705 Qinghai-Tibetan Plateau to climate change and disturbances, *Environmental Earth Sciences*, 71, 1421-  
706 1431, 2014.

707 QPBS: 'Qinghai Statistical Yearbook 2015.'(China Statistics Press:Beijing), 2015. 2015.

708 QPBS: 'Qinghai Statistical Yearbook 2015.'(China Statistics Press:Beijing), 2005. 2005.

709 Riedo, M., Gyalistras, D., and Fuhrer, J.: Net primary production and carbon stocks in differently  
710 managed grasslands: simulation of site-specific sensitivity to an increase in atmospheric CO<sub>2</sub> and to  
711 climate change, *Ecological Modelling*, 134, 207-227, 2000.

712 Schuman, G. E., Reeder, J. D., Manley, J. T., Hart, R. H., and Manley, W. A.: Impact of Grazing  
713 Management on the Carbon and Nitrogen Balance of a Mixed-Grass Rangeland, *Ecological Applications*,  
714 9, 65-71, 1999.

715 Schuur, E. A. G.: Productivity and global climate revisited: The sensitivity of tropical forest growth to  
716 precipitation, *Ecology*, 84, 1165-1170, 2003.

717 Shen, M., Tang, Y., Chen, J., Zhu, X., and Zheng, Y.: Influences of temperature and precipitation before  
718 the growing season on spring phenology in grasslands of the central and eastern Qinghai-Tibetan Plateau,  
719 *Agricultural and Forest Meteorology*, 151, 1711-1722, 2011.

720 Shi, X. Z., Yu, D. S., Warner, E. D., Pan, X. Z., Petersen, G. W., Gong, Z. G., and Weindorf, D. C.: Soil  
721 database of 1:1,000,000 digital soil survey and reference system of the Chinese Genetic Soil  
722 Classification System, *Soil Survey Horizons*, 45, 129-136, 2004.

723 Tan, K., Ciais, P., Piao, S., Wu, X., Tang, Y., Vuichard, N., Liang, S., and Fang, J.: Application of the  
724 ORCHIDEE global vegetation model to evaluate biomass and soil carbon stocks of Qinghai-Tibetan  
725 grasslands, *Global Biogeochemical Cycles*, 24, 2010.

726 Tanentzap, A. J. and Coomes, D. A.: Carbon storage in terrestrial ecosystems: do browsing and grazing  
727 herbivores matter?, *Biological Reviews*, 87, 72-94, 2012.

728 van Vuuren, D., Edmonds, J., Kainuma, M., Riahi, K., Thomson, A., Hibbard, K., Hurtt, G., Kram, T.,  
729 Krey, V., Lamarque, J.-F., Masui, T., Meinshausen, M., Nakicenovic, N., Smith, S., and Rose, S.: The  
730 representative concentration pathways: an overview, *Climatic Change*, 109, 5-31, 2011.

731 Veen, G. F., Geuverink, E., and Olf, H.: Large grazers modify effects of aboveground-belowground  
732 interactions on small-scale plant community composition, *Oecologia*, 168, 511-518, 2012.

733 Wang, G., Li, Y., Wang, Y., and Wu, Q.: Effects of permafrost thawing on vegetation and soil carbon pool  
734 losses on the Qinghai-Tibet Plateau, China, *Geoderma*, 143, 143-152, 2008.

735 Wang, G. X., Qian, J., Cheng, G. D., and Lai, Y. M.: Soil organic carbon pool of grassland soils on the  
736 Qinghai-Tibetan Plateau and its global implication, *Science of the Total Environment*, 291, 207-217,  
737 2002.

738 Wienhold, B. J., Hendrickson, J. R., and Karn, J. F.: Pasture management influences on soil properties in  
739 the Northern Great Plains, *Journal Of Soil and Water Conservation*, 56, 27-31, 2001.

740 Willmott, C. J.: Some Comments on the Evaluation of Model Performance, *Bulletin of the American*  
741 *Meteorological Society*, 63, 1309-1313, 1982.

742 Wu, G.-L., Du, G.-Z., Liu, Z.-H., and Thirgood, S.: Effect of fencing and grazing on a Kobresia-  
743 dominated meadow in the Qinghai-Tibetan Plateau, *Plant and Soil*, 319, 115-126, 2009.

744 Xu, G., Hu, Y., Wang, S., Zhang, Z., Chang, X., Duan, J., Luo, C., Chao, Z., Su, A., Lin, Q., Li, Y., and  
745 Du, M.: Effects of litter quality and climate change along an elevation gradient on litter mass loss in an  
746 alpine meadow ecosystem on the Tibetan plateau, *Plant Ecology*, 209, 257-268, 2010.

747 Xu, R., Wang, M., and Wang, Y.: Using a modified DNDC model to estimate N<sub>2</sub>O fluxes from semi-arid  
748 grassland in China, *Soil Biology & Biochemistry*, 35, 615-620, 2003.

749 Xu, X., Sherry, R. A., Niu, S., Zhou, J., and Luo, Y.: Long-term experimental warming decreased labile  
750 soil organic carbon in a tallgrass prairie, *Plant and Soil*, 361, 307-315, 2012.

751 Xu, Y., Xu, C. H., Gao, X. J., and Luo, Y.: Projected changes in temperature and precipitation extremes  
752 over the Yangtze River Basin of China in the 21st century, *Quaternary International*, 208, 44-52, 2009.

753 Yan, L., Zhou, G., and Zhang, F.: Effects of Different Grazing Intensities on Grassland Production in  
754 China: A Meta-Analysis, *Plos One*, 8, 2013.

755 Yan, L., Zhou, G. S., Wang, Y. H., Hu, T. Y., and Sui, X. H.: The spatial and temporal dynamics of carbon  
756 budget in the alpine grasslands on the Qinghai-Tibetan Plateau using the Terrestrial Ecosystem Model,  
757 *Journal of Cleaner Production*, 107, 195-201, 2015.

758 Yang, Y., Fang, J., Tang, Y., Ji, C., Zheng, C., He, J., and Zhu, B.: Storage, patterns and controls of soil  
759 organic carbon in the Tibetan grasslands, *Global Change Biology*, 14, 1592-1599, 2008.

760 Yu, D.-S., Shi, X.-Z., Wang, H.-J., Sun, W.-X., Warner, E. D., and Liu, Q.-H.: National Scale Analysis of  
761 Soil Organic Carbon Storage in China Based on Chinese Soil Taxonomy, *Pedosphere*, 17, 11-18, 2007a.

762 Yu, D. S., Shi, X. Z., Wang, H. J., Sun, W. X., Chen, J. M., Liu, Q. H., and Zhao, Y. C.: Regional patterns  
763 of soil organic carbon stocks in China, *Journal of Environmental Management*, 85, 680-689, 2007b.

764 Zeng, C., Wu, J., and Zhang, X.: Effects of Grazing on Above- vs. Below-Ground Biomass Allocation of  
765 Alpine Grasslands on the Northern Tibetan Plateau, *Plos One*, 10, 2015.

766 Zhang, B.: On the Livestock Development of Qinghai Province during the Time of Republic of China  
767 (1912—1949) , *Ancient and Modern Agriculture*, 2011. 91-100, 2011.

768 Zhang, R., Li, Z., Yuan, Y., Li, Z., and Yin, F.: Analyses on the Changes of Grazing Capacity in the  
769 Three-River Headwaters Region of China under Various Climate Change Scenarios, *Advances in*  
770 *Meteorology*, doi: 10.1155/2013/951261, 2013. 2013.

771 Zhang, W., Liu, C., Zheng, X., Zhou, Z., Cui, F., Zhu, B., Haas, E., Klatt, S., Butterbach-Bahl, K., and

772 Kiese, R.: Comparison of the DNDC, LandscapeDNDC and IAP-N-GAS models for simulating nitrous  
773 oxide and nitric oxide emissions from the winter wheat–summer maize rotation system, *Agricultural*  
774 *Systems*, 140, 1-10, 2015.

775 Zhang, Y., Min, Q., Zhao, G., Jiao, W., Liu, W., and Bijaya G.C., D.: Can Clean Energy Policy Improve  
776 the Quality of Alpine Grassland Ecosystem? A Scenario Analysis to Influence the Energy Changes in the  
777 Three-River Headwater Region, China, *Sustainability*, 8, 231, 2016.

778 Zhang, Y. and Niu, H.: The development of the DNDC plant growth sub-model and the application of  
779 DNDC in agriculture: A review, *Agriculture, Ecosystems & Environment*, 230, 271-282, 2016.

780 Zhao, Z., Sha, Z., Liu, Y., Wu, S., Zhang, H., Li, C., Zhao, Q., and Cao, L.: Modeling the impacts of  
781 alternative fertilization methods on nitrogen loading in rice production in Shanghai, *Science of The Total*  
782 *Environment*, 566–567, 1595-1603, 2016.

783 Zhou, D., Fan, G., Huang, R., Fang, Z., Liu, Y., and Li, H.: Interannual variability of the normalized  
784 difference vegetation index on the Tibetan plateau and its relationship with climate change, *Advances in*  
785 *Atmospheric Sciences*, 24, 474-484, 2007.

786 Zhu, X. J., Yu, G. R., Wang, Q. F., Gao, Y. N., He, H. L., Zheng, H., Chen, Z., Shi, P. L., Zhao, L., Li, Y.  
787 N., Wang, Y. F., Zhang, Y. P., Yan, J. H., Wang, H. M., Zhao, F. H., and Zhang, J. H.: Approaches of  
788 climate factors affecting the spatial variation of annual gross primary productivity among terrestrial  
789 ecosystems in China, *Ecol. Indic.*, 62, 174-181, 2016.

790

Table 1. Projected climatic changes (precipitation and maximum, minimum, and mean air temperature) under the RCP4.5 and RCP8.5 scenarios in 2044 compared with the corresponding values in the baseline data (2014).

| Scenarios | Air temperature (°C) |                  |                   | Precipitation(mm) |
|-----------|----------------------|------------------|-------------------|-------------------|
|           | T <sub>max</sub>     | T <sub>min</sub> | T <sub>mean</sub> |                   |
| Baseline  | 3.63                 | -16.88           | -3.56             | 279.24            |
| RCP4.5    | +0.99                | +0.44            | +0.72             | +11.81            |
| RCP8.5    | +1.09                | +0.51            | +0.80             | +12.50            |

Table 2. Summary of two-way analysis of variance for biomass and SOC relative to the climate, grazing intensity, and their interactions during 1985–2044. Degrees of freedom (d.f.), mean squares (M.S.), variance ratio (*F*-value), and level of significance (*P*-value) are shown.

| Source of variation       | d.f. | Biomass  |                 |                 | SOC    |                 |                 |
|---------------------------|------|----------|-----------------|-----------------|--------|-----------------|-----------------|
|                           |      | M.S.     | <i>F</i> -value | <i>P</i> -value | M.S.   | <i>F</i> -value | <i>P</i> -value |
| Climate                   | 2    | 16827.91 | 54.27           | **              | 468.16 | 723.54          | **              |
| Grazing Intensity         | 3    | 22132.64 | 71.37           | **              | 17.29  | 26.72           | **              |
| Climate*Grazing Intensity | 6    | 2.63     | 0.01            | n.s.            | 0.28   | 0.28            | n.s.            |

\*\* Indicate the population means of the treatment are significantly different at 0.05 level; n.s., the means no significant different.

带格式表格

删除的内容: . Significant effect  
 删除的内容: effect

Table 3. The simulated SOC concentrations and total biomass under climate and grazing scenarios.

| Scenarios | Total biomass          | SOC (0–20 cm) concentrations |
|-----------|------------------------|------------------------------|
|           | (g C m <sup>-2</sup> ) | (g C kg <sup>-1</sup> )      |
| Climate   | Realistic (1985–2014)  | 66.18                        |
|           | RCP4.5 (2015–2044)     | 63.44                        |
|           | RCP8.5 (2015–2044)     | 63.37                        |
|           | LSD <sub>0.05</sub>    | 0.09                         |
| Grazing   | Baseline               | 64.49                        |
|           | G0                     | 64.37                        |
|           | G-50                   | 64.64                        |
|           | G+50                   | 65.26                        |
|           | LSD <sub>0.05</sub>    | 0.10                         |

LSD<sub>0.05</sub>: Least significant difference at 0.05 level.

带格式的: 字体:(中文) 宋体, 五号  
 带格式的: 无孤行控制  
 删除的内容: two-way ANOVA of

删除的内容: -

带格式的: 非 上标/ 下标

Table 4. Multiple linear regression analysis of grassland biomass and SOC change with relative factors.

|         | Variables numbers | R-square | PRESS    | Temperature | Precipitation | Grazing Intensity |
|---------|-------------------|----------|----------|-------------|---------------|-------------------|
| Biomass | 1                 | 26.4     | 273067.7 | X           |               |                   |
|         | 1                 | 6.4      | 370402.4 |             |               | X                 |
|         | 1                 | 0.4      | 349337.6 |             | X             |                   |
|         | 2                 | 26.4     | 287817.3 | X           | X             |                   |
|         | 2                 | 26.4     | 301908.4 | X           |               | X                 |

删除的内容: 5



|            |   |      |          |   |   |   |
|------------|---|------|----------|---|---|---|
|            | 2 | 8.6  | 383224.5 |   | X | X |
|            | 3 | 26.4 | 326183.5 | X | X | X |
| <b>SOC</b> | 1 | 47.6 | 179.2    |   | X |   |
|            | 1 | 2.3  | 310.9    |   |   | X |
|            | 1 | 0.4  | 322.9    | X |   |   |
|            | 2 | 47.9 | 185.5    |   | X | X |
|            | 2 | 47.7 | 189.5    | X | X |   |
|            | 2 | 4.7  | 328.8    | X |   | X |
|            | 3 | 48.6 | 199.1    | X | X | X |

PRESS: The prediction sum of squares. The smaller the PRESS value, the better the model's predictive ability.

X: Indicates variable applied in the regression.

Table 3. Simulated total biomass (mean  $\pm$  SE) under the realistic, RCP4.5 and RCP8.5 scenarios for the G<sub>0</sub>, G<sub>-50</sub>, baseline, and G<sub>+50</sub> treatments.

| Management practice | Total biomass (g C m <sup>-2</sup> ) |                                |                                |
|---------------------|--------------------------------------|--------------------------------|--------------------------------|
|                     | Realistic (1985–2014)                | RCP4.5 (2015–2044)             | RCP8.5 (2015–2044)             |
| G <sub>0</sub>      | 223.6 $\pm$ 10.8 <sup>aA</sup>       | 207.0 $\pm$ 10.3 <sup>aB</sup> | 199.5 $\pm$ 10.2 <sup>aB</sup> |
| G <sub>-50</sub>    | 213.3 $\pm$ 10.5 <sup>bA</sup>       | 197.3 $\pm$ 10.1 <sup>bB</sup> | 189.7 $\pm$ 10.1 <sup>bB</sup> |
| Baseline            | 202.1 $\pm$ 10.4 <sup>cA</sup>       | 186.5 $\pm$ 10.0 <sup>cB</sup> | 178.9 $\pm$ 10.0 <sup>cB</sup> |
| G <sub>+50</sub>    | 190.2 $\pm$ 10.4 <sup>dA</sup>       | 173.9 $\pm$ 10.0 <sup>dB</sup> | 166.3 $\pm$ 10.0 <sup>dB</sup> |

SE: Standard error, which representing interannual variations of the mean values. Significant differences among management practices are indicated by letters. Values within a column followed by the same lowercase letters or within a row followed by the same uppercase letter are not different at  $P < 0.05$ .

Table 4. Simulated SOC (mean  $\pm$  SE) under the realistic, RCP4.5, and RCP8.5 scenarios for the G<sub>0</sub>, G<sub>-50</sub>, baseline and G<sub>+50</sub> treatments.

| Management practice | Soil organic carbon (0–20 cm) concentrations (g C kg <sup>-1</sup> ) |                                |                                |
|---------------------|----------------------------------------------------------------------|--------------------------------|--------------------------------|
|                     | Realistic (1985–2014)                                                | RCP4.5 (2015–2044)             | RCP8.5 (2015–2044)             |
| G <sub>0</sub>      | 65.84 $\pm$ 2.30 <sup>aA</sup>                                       | 62.94 $\pm$ 2.20 <sup>aB</sup> | 62.87 $\pm$ 2.20 <sup>aB</sup> |
| G <sub>-50</sub>    | 66.04 $\pm$ 2.30 <sup>aA</sup>                                       | 63.27 $\pm$ 2.21 <sup>aB</sup> | 63.20 $\pm$ 2.20 <sup>bB</sup> |
| Baseline            | 66.32 $\pm$ 2.31 <sup>bA</sup>                                       | 63.61 $\pm$ 2.21 <sup>bB</sup> | 63.53 $\pm$ 2.21 <sup>bB</sup> |
| G <sub>+50</sub>    | 66.59 $\pm$ 2.31 <sup>bA</sup>                                       | 63.96 $\pm$ 2.22 <sup>bB</sup> | 63.88 $\pm$ 2.21 <sup>bB</sup> |

SE: Standard error which representing interannual variations of the mean values. Significant differences among management practices are indicated by letters. Values within a column followed by the same lowercase letters or within a row followed by the same uppercase letter are not different at  $P < 0.05$ .

|         | Scenarios             | Total biomass (g C m <sup>-2</sup> ) | Soil organic carbonSOC (0–20 cm) concentrations (g C kg <sup>-1</sup> ) |
|---------|-----------------------|--------------------------------------|-------------------------------------------------------------------------|
| Climate | Realistic (1985–2014) | 204.01                               | 66.18                                                                   |
|         | RCP4.5 (2015–2044)    | 191.17                               | 63.44                                                                   |
|         | RCP8.5 (2015–2044)    | 183.62                               | 63.37                                                                   |

|         |                     |        |       |
|---------|---------------------|--------|-------|
|         | LSD <sub>0.05</sub> | 3.87   | 0.09  |
| Grazing | Baseline            | 187.83 | 64.49 |
|         | G0                  | 211.42 | 64.37 |
|         | G-50                | 201.41 | 64.64 |
|         | G+50                | 178.11 | 65.26 |
|         | LSD <sub>0.05</sub> | 4.47   | 0.10  |

LSD<sub>0.05</sub>: Least significant differenceLeast sifnifiantlysignificantly difference at 0.05 level.

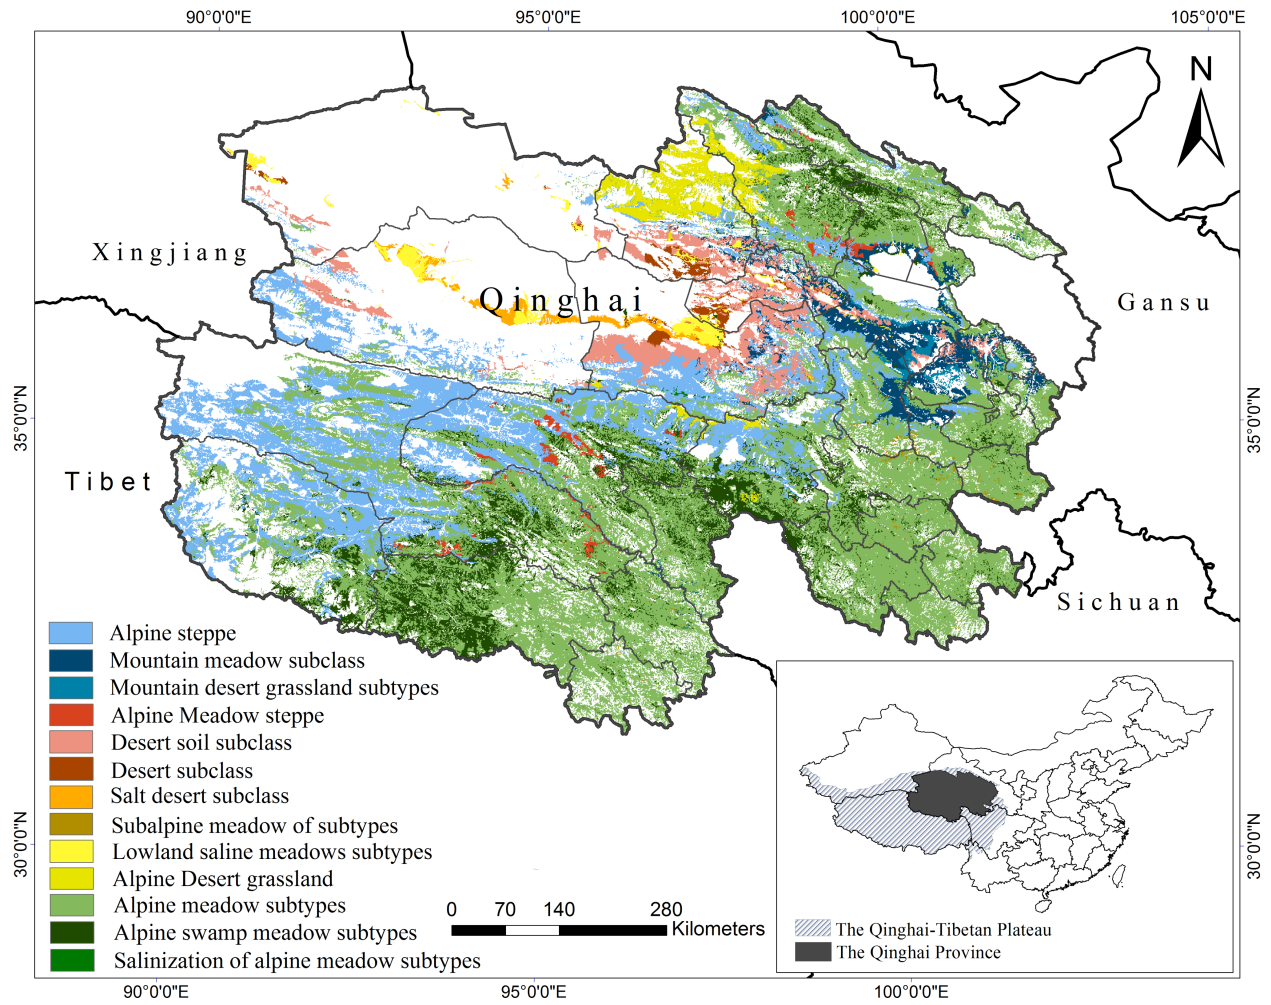

Fig. 1. Location of the study area and spatial distribution of the main grassland types. White areas are not covered by grassland.

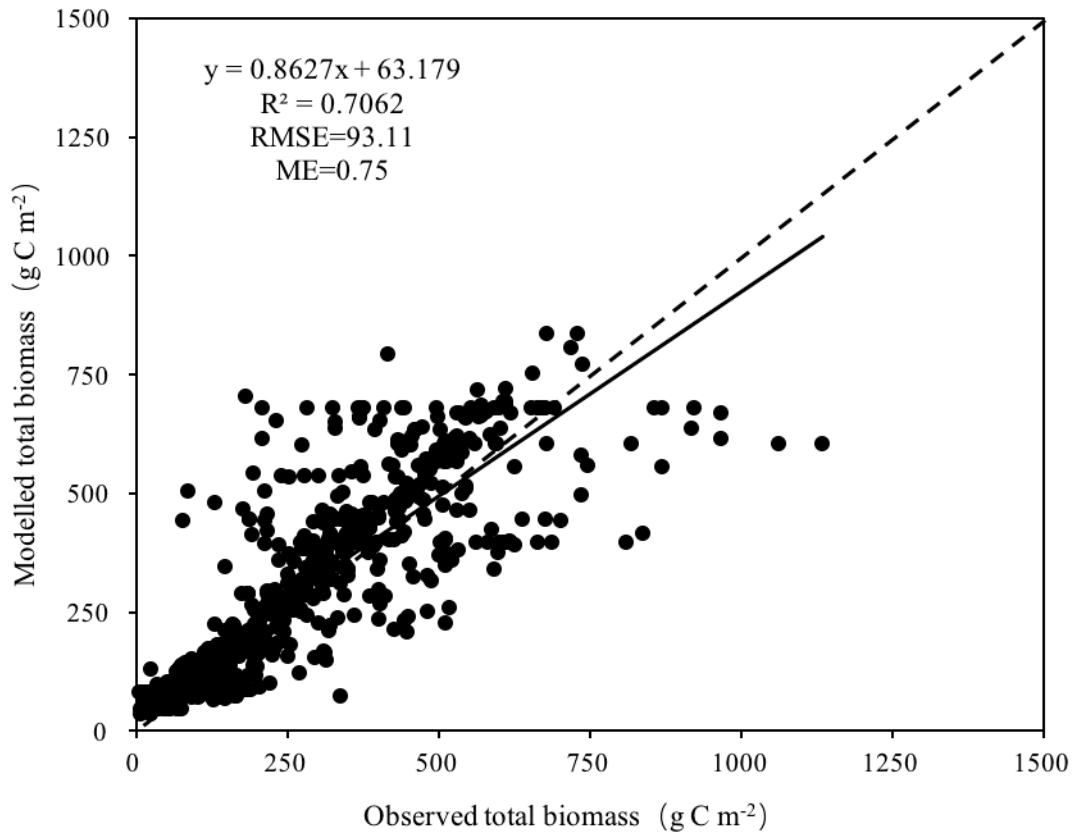

Fig. 2. Comparison of the modeled and observed total biomass values.

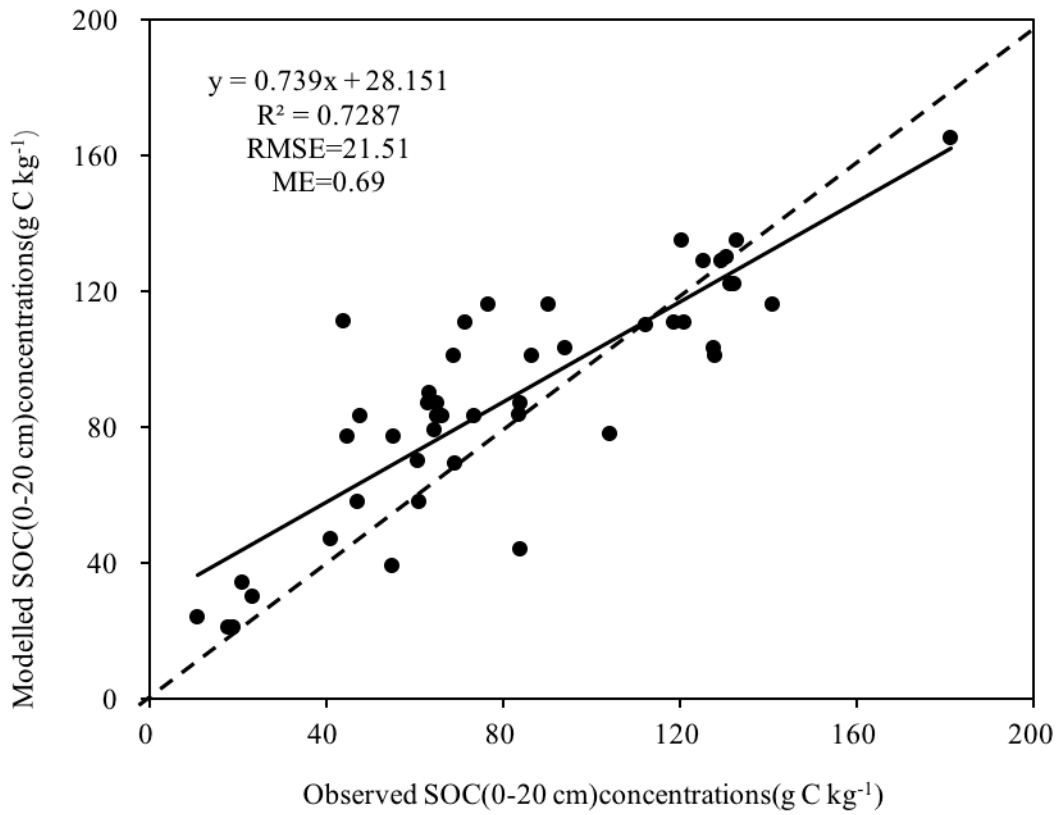

Fig. 3. Comparison of the modeled and observed SOC concentrations (0–20 cm).

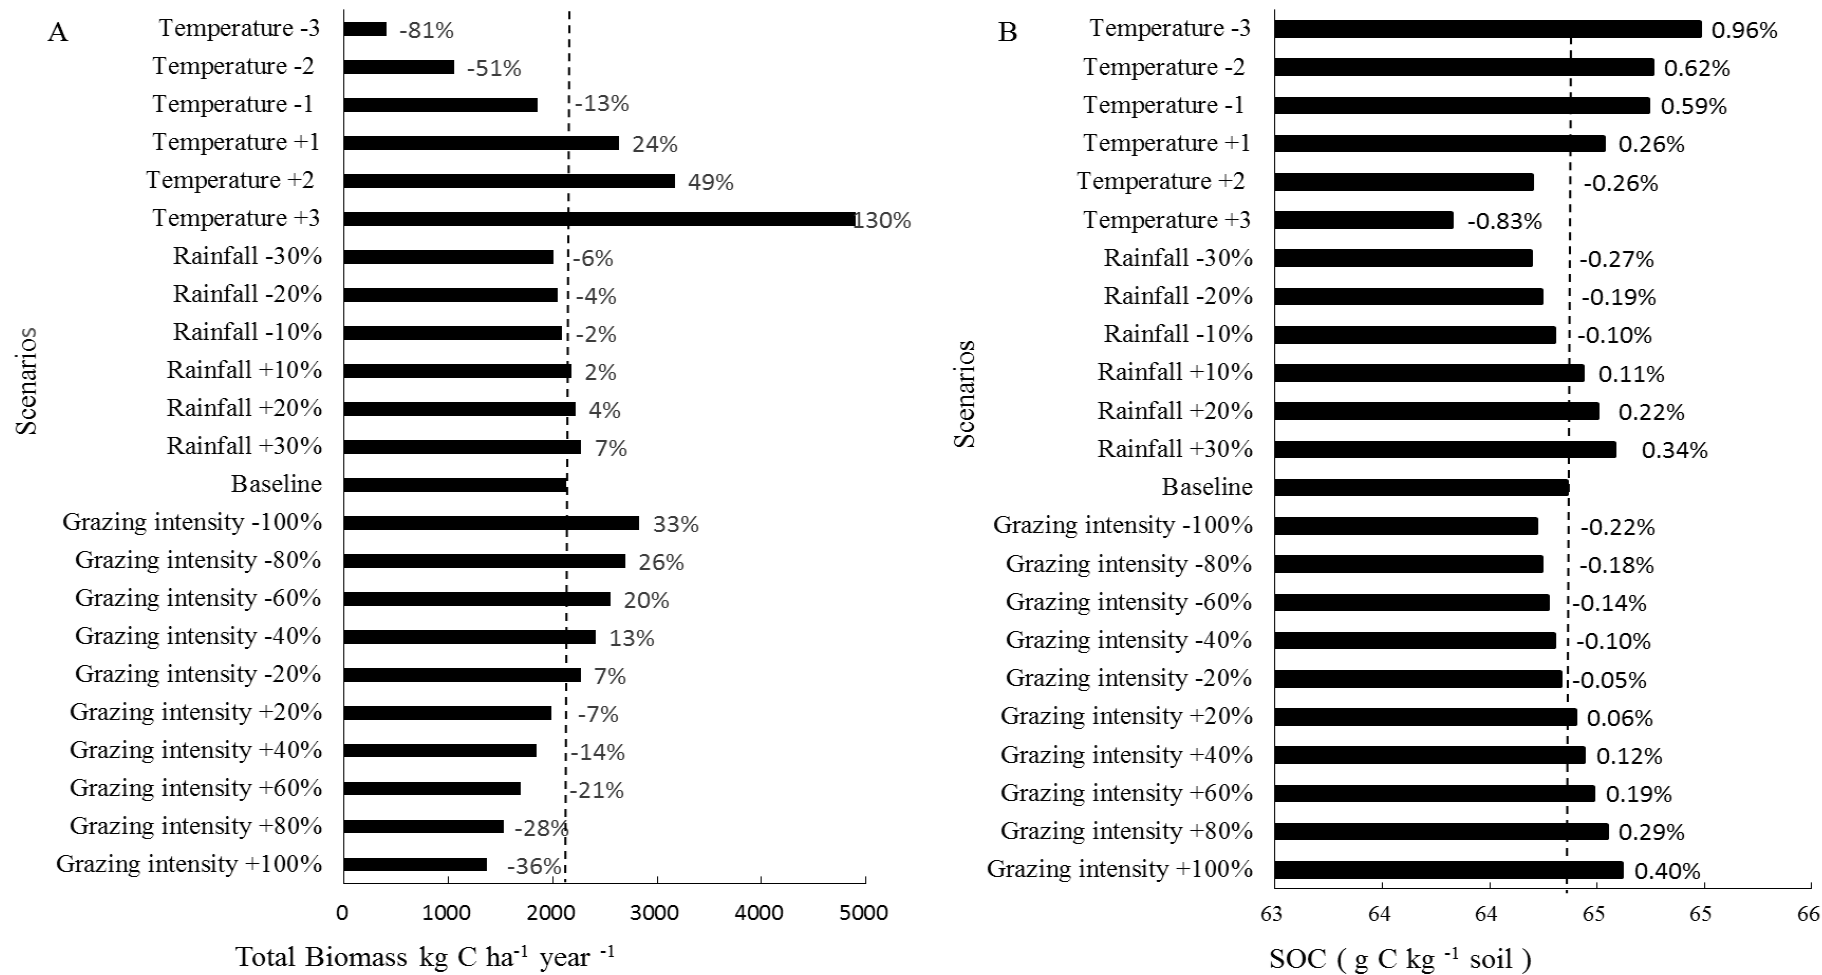

Fig. 4. Sensitivity analysis of model response to climate and grazing intensity change. The baseline biomass and SOC were the average value of a 55-year (1961-2014) simulation based on the actual climate and grazing conditions in the study area.

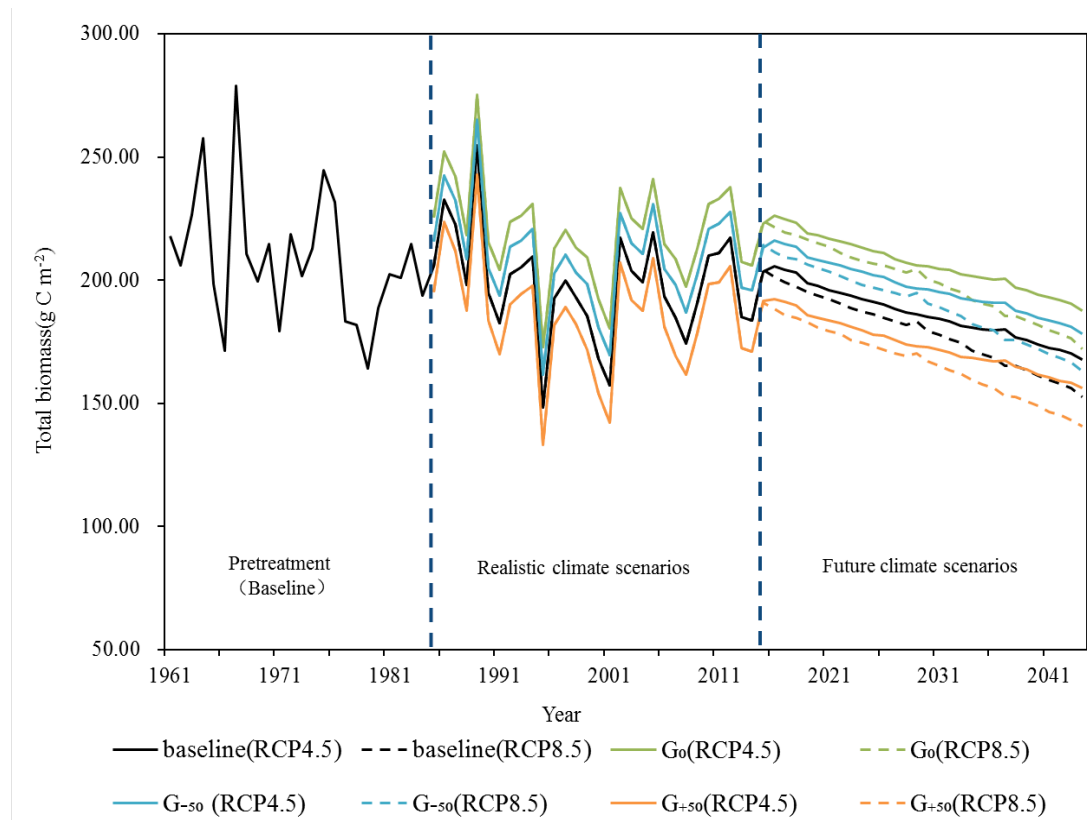

Fig. 5. Variations in the area-weighted mean biomass value under different scenarios. The stage on the left represents the preprocessing period from 1961 to 1984. The stage in the middle represents the realistic climate scenarios. The stage on the right represents future climate scenarios.

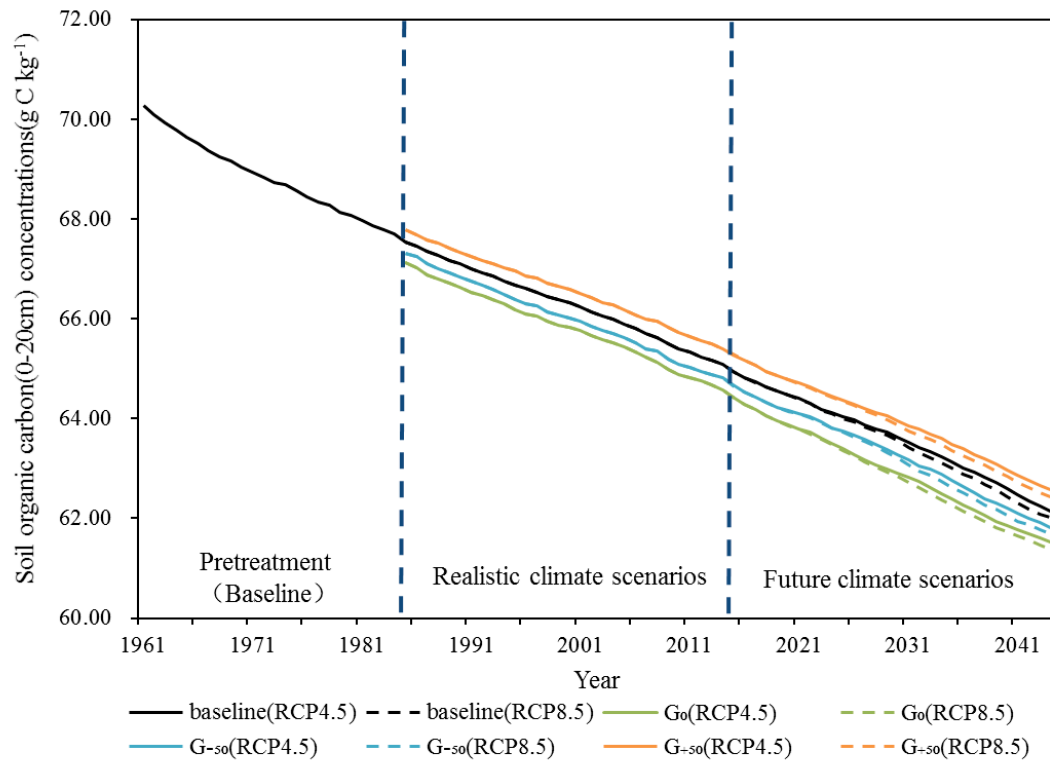

Fig. 6. Variations in the area-weighted mean SOC value under different scenarios. The stage on the left represents the preprocessing period from 1961 to 1984. The stage in the middle represents the realistic climate scenarios. The stage on the right represents future climate scenarios.



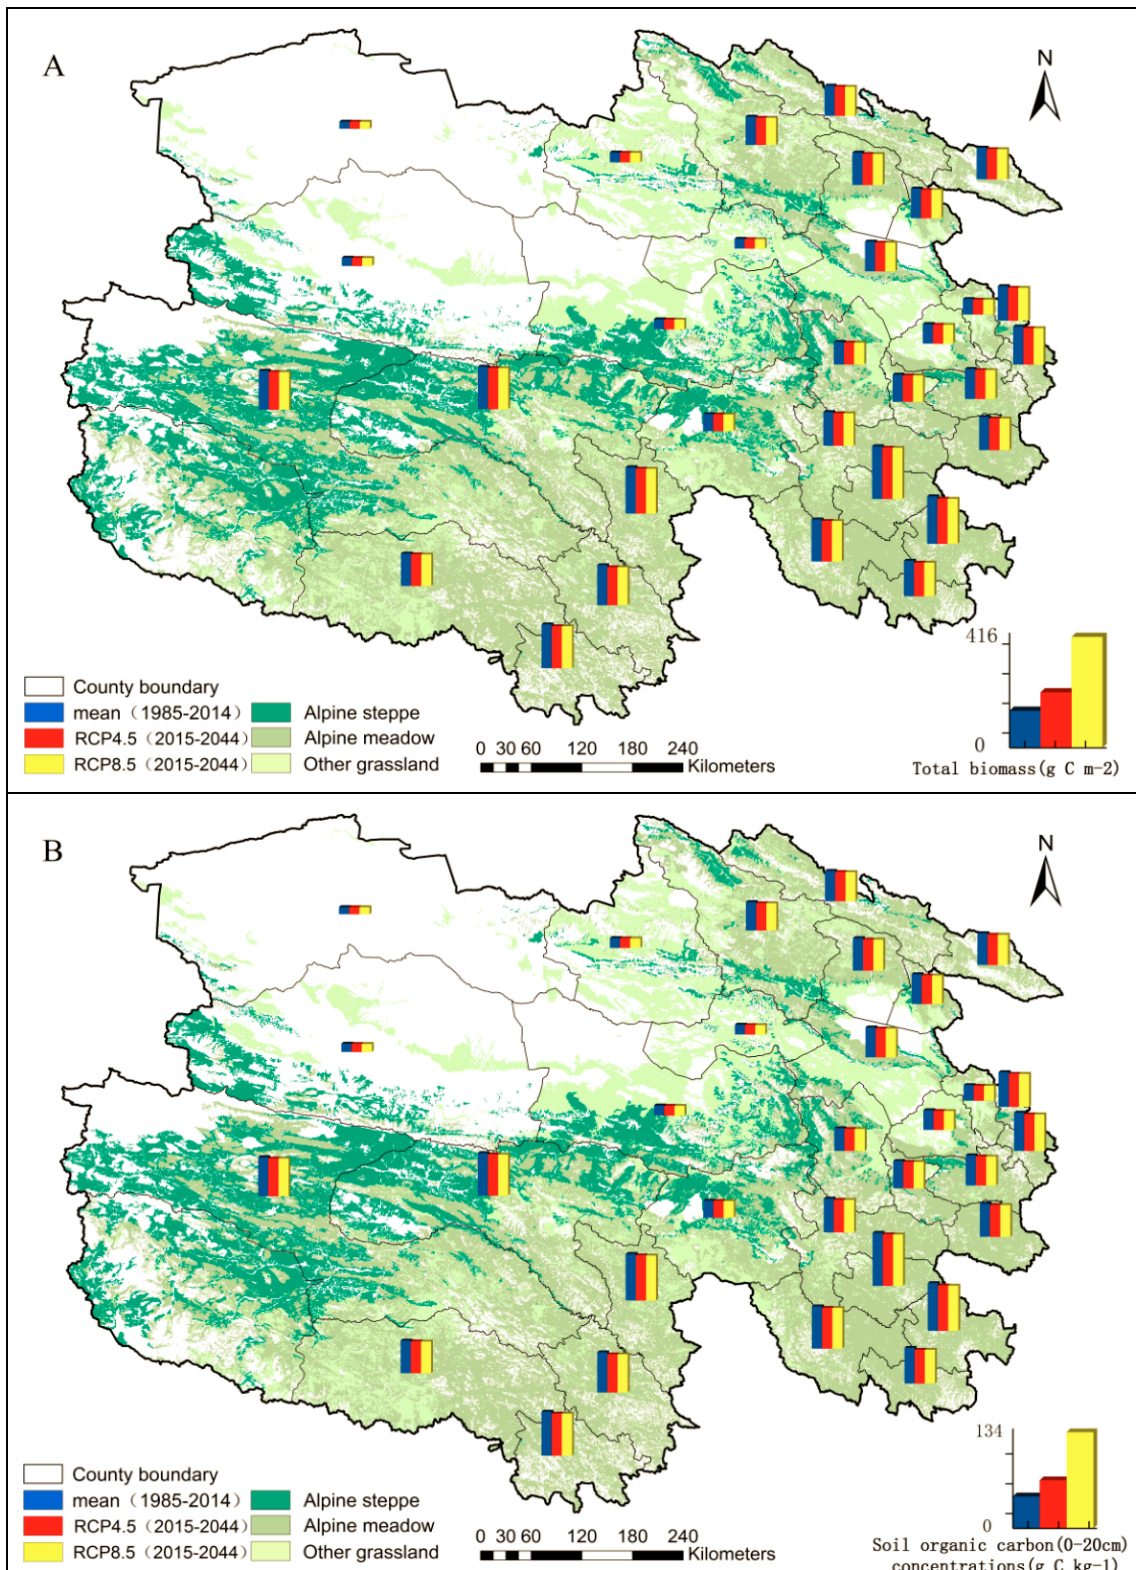

Fig. 7. Responses of the grassland biomass(A) and SOC(B) to climate change at a regional scale.

Table S1. Changes in livestock(million heads) in Qinghai province during the period from 1949 (data from Zhang (2011)) to 2015 (data from QPBS (2015)).

| <b>Livestock</b>    | <b>1949</b> | <b>1978</b> | <b>1980</b> | <b>1985</b> | <b>1990</b> | <b>1992</b> | <b>1993</b> | <b>1994</b> | <b>1995</b> | <b>1996</b> | <b>1997</b> | <b>1998</b> | <b>1999</b> | <b>2000</b> | <b>2001</b> |
|---------------------|-------------|-------------|-------------|-------------|-------------|-------------|-------------|-------------|-------------|-------------|-------------|-------------|-------------|-------------|-------------|
| Yaks                |             | 4.97        | 4.87        | 5.16        | 5.39        | 5.51        | 5.09        | 5.24        | 5.01        | 4.43        | 4.22        | 3.94        | 3.78        | 3.91        | 4.01        |
| Sheep and goats     |             | 16.45       | 16.13       | 13.28       | 16.08       | 16.48       | 16.35       | 16.77       | 16.66       | 15.70       | 16.01       | 16.39       | 16.40       | 16.42       | 16.76       |
| Other large Animals |             | 0.71        | 0.67        | 0.74        | 0.74        | 0.72        | 0.66        | 0.63        | 0.58        | 0.62        | 0.60        | 0.57        | 0.53        | 0.51        | 0.54        |
| Total livestock     | 7.49        | 22.13       | 21.67       | 19.18       | 22.21       | 22.71       | 22.10       | 22.65       | 22.25       | 20.75       | 20.83       | 20.91       | 20.71       | 20.83       | 21.31       |
| <b>Livestock</b>    | <b>2002</b> | <b>2003</b> | <b>2004</b> | <b>2005</b> | <b>2006</b> | <b>2007</b> | <b>2008</b> | <b>2009</b> | <b>2010</b> | <b>2011</b> | <b>2012</b> | <b>2013</b> | <b>2014</b> | <b>2015</b> |             |
| Yaks                | 4.11        | 4.06        | 4.04        | 4.06        | 4.50        | 4.47        | 4.45        | 4.45        | 4.36        | 4.42        | 4.74        | 4.52        | 4.44        | 4.80        |             |
| Sheep and goats     | 17.33       | 17.62       | 17.64       | 17.66       | 15.02       | 14.97       | 14.97       | 14.98       | 15.05       | 14.98       | 15.12       | 14.42       | 14.21       | 14.31       |             |
| Other large Animals | 0.52        | 0.50        | 0.49        | 0.47        | 0.36        | 0.41        | 0.39        | 0.36        | 0.36        | 0.36        | 0.34        | 0.33        | 0.32        | 0.32        |             |
| Total livestock     | 21.95       | 22.18       | 22.17       | 22.19       | 19.88       | 19.85       | 19.81       | 19.78       | 19.77       | 19.76       | 20.21       | 19.27       | 18.97       | 19.42       |             |

Table S2. Livestock grazing intensity in each county in the study area.

| County           | Grazing Intensity                       |                                              | County         | Grazing Intensity                       |                                              |
|------------------|-----------------------------------------|----------------------------------------------|----------------|-----------------------------------------|----------------------------------------------|
|                  | Yak/Cattle<br>(heads ha <sup>-1</sup> ) | Sheep and Goats<br>(heads ha <sup>-1</sup> ) |                | Yak/Cattle<br>(heads ha <sup>-1</sup> ) | Sheep and Goats<br>(heads ha <sup>-1</sup> ) |
| <b>Tianjun</b>   | 0.04                                    | 0.32                                         | <b>Banma</b>   | 0.29                                    | 0.32                                         |
| <b>Dulan</b>     | 0.02                                    | 0.16                                         | <b>Maqin</b>   | 0.24                                    | 0.27                                         |
| <b>Wulan</b>     | 0.04                                    | 0.40                                         | <b>Guinan</b>  | 0.24                                    | 1.39                                         |
| <b>Delinha</b>   | 0.01                                    | 0.11                                         | <b>Xinghai</b> | 0.18                                    | 1.03                                         |
| <b>Geermu</b>    | 0.01                                    | 0.05                                         | <b>Guide</b>   | 0.18                                    | 1.03                                         |
| <b>Xisanzhen</b> | 0.03                                    | 0.23                                         | <b>Tongde</b>  | 0.36                                    | 2.10                                         |
| <b>Qumalai</b>   | 0.04                                    | 0.09                                         | <b>Gonghe</b>  | 0.16                                    | 0.94                                         |
| <b>Nangqian</b>  | 0.18                                    | 0.38                                         | <b>Henan</b>   | 0.38                                    | 0.92                                         |
| <b>Zhiduo</b>    | 0.02                                    | 0.05                                         | <b>Zeku</b>    | 0.40                                    | 0.98                                         |
| <b>Chengduo</b>  | 0.13                                    | 0.29                                         | <b>Jianzha</b> | 0.61                                    | 1.48                                         |
| <b>Zaduo</b>     | 0.04                                    | 0.10                                         | <b>Tongren</b> | 0.29                                    | 0.69                                         |
| <b>Yushu</b>     | 0.15                                    | 0.32                                         | <b>Gangcha</b> | 0.25                                    | 1.28                                         |
| <b>Maduo</b>     | 0.05                                    | 0.06                                         | <b>Haiyan</b>  | 0.24                                    | 1.20                                         |
| <b>Jiuzhi</b>    | 0.20                                    | 0.22                                         | <b>Qilian</b>  | 0.19                                    | 0.95                                         |
| <b>Dari</b>      | 0.16                                    | 0.18                                         | <b>Menyuan</b> | 0.32                                    | 1.63                                         |
| <b>Gande</b>     | 0.31                                    | 0.34                                         |                |                                         |                                              |

The number of horses has decreased each year and at the end of 2014, the number of horses only accounted for 1.7% of the total number of grazing livestock. Therefore, we combined the data for horses and cattle to calculate the grazing intensity. The baseline grazing intensity was based on the grazing data from 2005, which was the highest in recent decades, and the grassland monitoring project also started in that year.

Table S3. Livestock grazing parameters employed in this study.

| <b>Parameters</b>                              | <b>Yak/Cattle</b> | <b>Sheep</b> | <b>Horse</b> |
|------------------------------------------------|-------------------|--------------|--------------|
| <b>Daily C intake (kg C head<sup>-1</sup>)</b> | 2.48 <sup>a</sup> | 0.50         | 4.01         |
| <b>Milk C fraction [0-1]</b>                   | 0.01              | 0.00         | 0.01         |
| <b>Meat C fraction [0-1]</b>                   | 0.05              | 0.04         | 0.05         |
| <b>Urine C fraction [0-1]</b>                  | 0.02              | 0.06         | 0.02         |
| <b>Dung C fraction [0-1]</b>                   | 0.44              | 0.42         | 0.44         |
| <b>Enteric CH<sub>4</sub> C fraction [0-1]</b> | 0.02              | 0.03         | 0.02         |
| <b>Respiration C fraction [0-1]</b>            | 0.46              | 0.45         | 0.46         |
| <b>Milk N fraction [0-1]</b>                   | 0.00              | 0.00         | 0.00         |
| <b>Meat N fraction [0-1]</b>                   | 0.30              | 0.30         | 0.30         |
| <b>Urine N fraction [0-1]</b>                  | 0.35              | 0.49         | 0.35         |
| <b>Dung N fraction [0-1]</b>                   | 0.35              | 0.21         | 0.35         |

<sup>a</sup> Parameters derived from (Dong Quan min and quan, 2007; Xue Bai et al., 2004)

Table s4. Input values for the main grassland type parameters used in the DNDC model.

| Parameters                                                                          | Mountain meadow subclass | Alpine steppe | Lowland saline meadow subtype | Alpine meadow subtype | Alpine swamp meadow subtype | Alpine desert | Desert soil subclass |
|-------------------------------------------------------------------------------------|--------------------------|---------------|-------------------------------|-----------------------|-----------------------------|---------------|----------------------|
| Maximum biomass production (kg C ha <sup>-1</sup> year <sup>-1</sup> ) <sup>a</sup> | 1157                     | 798           | 879                           | 2786                  | 3586                        | 1441          | 672                  |
| Grain fraction of biomass <sup>b</sup>                                              | 0.04                     | 0.03          | 0.03                          | 0.02                  | 0.02                        | 0.01          | 0.01                 |
| Leaf and stem fraction of biomass <sup>b</sup>                                      | 0.40                     | 0.40          | 0.42                          | 0.60                  | 0.40                        | 0.11          | 0.28                 |
| Root fraction of biomass <sup>b</sup>                                               | 0.56                     | 0.57          | 0.55                          | 0.38                  | 0.58                        | 0.88          | 0.71                 |
| C/N ratio of grain <sup>c</sup>                                                     | 34                       | 31            | 31                            | 34                    | 33                          | 26            | 25                   |
| C/N ratio of leaf and stem <sup>c</sup>                                             | 33                       | 30            | 30                            | 32                    | 31                          | 22            | 24                   |
| C/N ratio of root <sup>c</sup>                                                      | 40                       | 48            | 22                            | 59                    | 58                          | 25            | 19                   |
| Water requirement <sup>c</sup> (kg water kg <sup>-1</sup> dry matter)               | 200                      | 200           | 200                           | 200                   | 200                         | 200           | 200                  |
| Max height (m) <sup>a</sup>                                                         | 0.5                      | 0.6           | 0.5                           | 0.4                   | 0.4                         | 0.5           | 1                    |
| TDD <sup>d</sup>                                                                    | 1000                     | 1500          | 1000                          | 1500                  | 1500                        | 1000          | 1000                 |
| N fixation index <sup>d</sup>                                                       | 1.5                      | 1.5           | 1.5                           | 1.5                   | 1.5                         | 1.5           | 1.5                  |

<sup>a</sup>Parameters derived from field observations; <sup>b</sup>parameters derived from (ji et al., 1995); <sup>c</sup>parameters derived from (cai et al., 2007; li et al., 2016; lin et al., 2014); <sup>d</sup>parameters derived from the default values in the DNDC model.

## References

- cai, L. M., yan, L. H., wei, S. D., and xing, L. L.: Water Use Efficiency and Nitrogen Use Efficiency of Alpine Plants Grown in the East of Qinghai-Tibet Plateau, *Acta Botanica Boreali-Occidentalia Sinica*, 2007. 1216-1224, 2007.
- Dong Quan min and quan, Z. X.: Effects of Grazing Intensity and Time on Dry Matter Intake and its Apparent Digestibility of Yaks, *China Herbivores*, 27, 12-14, 2007.

- ji, W. Q., min, Z. X., qing, Z. Y., and xi, S. Z.: Community structure and biomass dynamic of the Kobresia pygmaea steep meadow, Acta Phytoecologica Sinica, 19,, 225-235, 1995.
- li, Z. L., hua, S. M., feng, Y. T., and hai, Y. F.: Feeding preference of Gynaephora menyuanensis and its relationships with plant carbon and nitrogen contents in an alpine meadow on the Tibetan plateau, ACTA ECOLOGICA SINICA, 2016. 2319-2326, 2016.
- lin, W. J., ming, Z. Z., hong, W. Z., xiong, C. B., qun, Y. C., xiang, H. X., xi, S. Z., Dacizhuoga, and zhou, Z. X.: Soil C/N distribution characteristics of alpine steppe ecosystem in Qinhai-Tibetan Plateau, ACTA ECOLOGICA SINICA, 2014. 6678-6691, 2014.
- QPBS: 'Qinghai Statistical Yearbook 2015.'(China Statistics Press:Beijing), 2015. 2015.
- Xue Bai, Zhao Xin quan, and sheng, Z. Y.: Feed Intake Dynamic of Grazing Livestock in Nature Grassland in Qinghai-Tibetan Plateau, Ecology of Domestic Animal, 25, 21-25, 2004.
- Zhang, B.: On the Livestock Development of Qinghai Province during the Time of Republic of China (1912—1949) , Ancient and Modern Agriculture, 2011. 91-100, 2011.

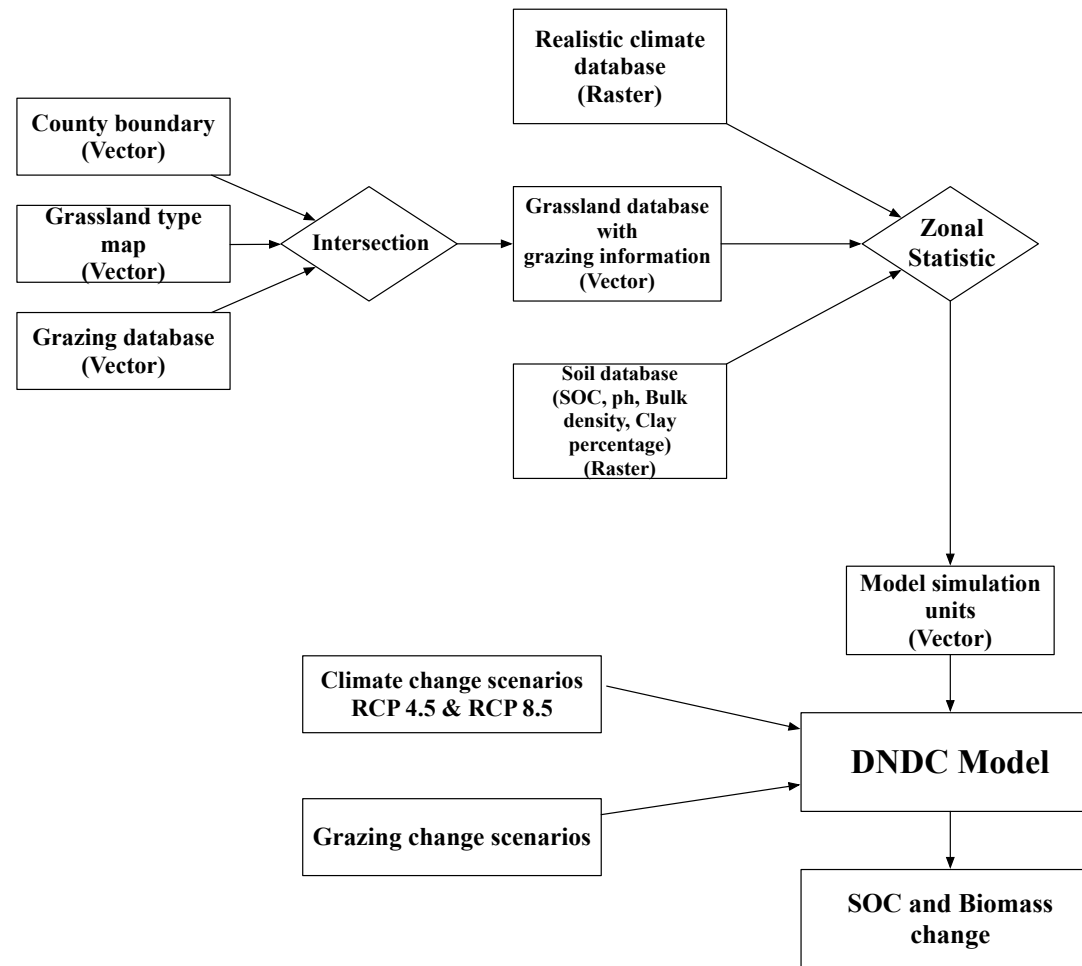

Fig. S1. The flowchart of model data preparation and simulation. The vector and raster inside the brackets indicate the input data format, and the intersection and zonal statistic inside the rhombus indicate the ArcGIS algorithm applied to process the data.

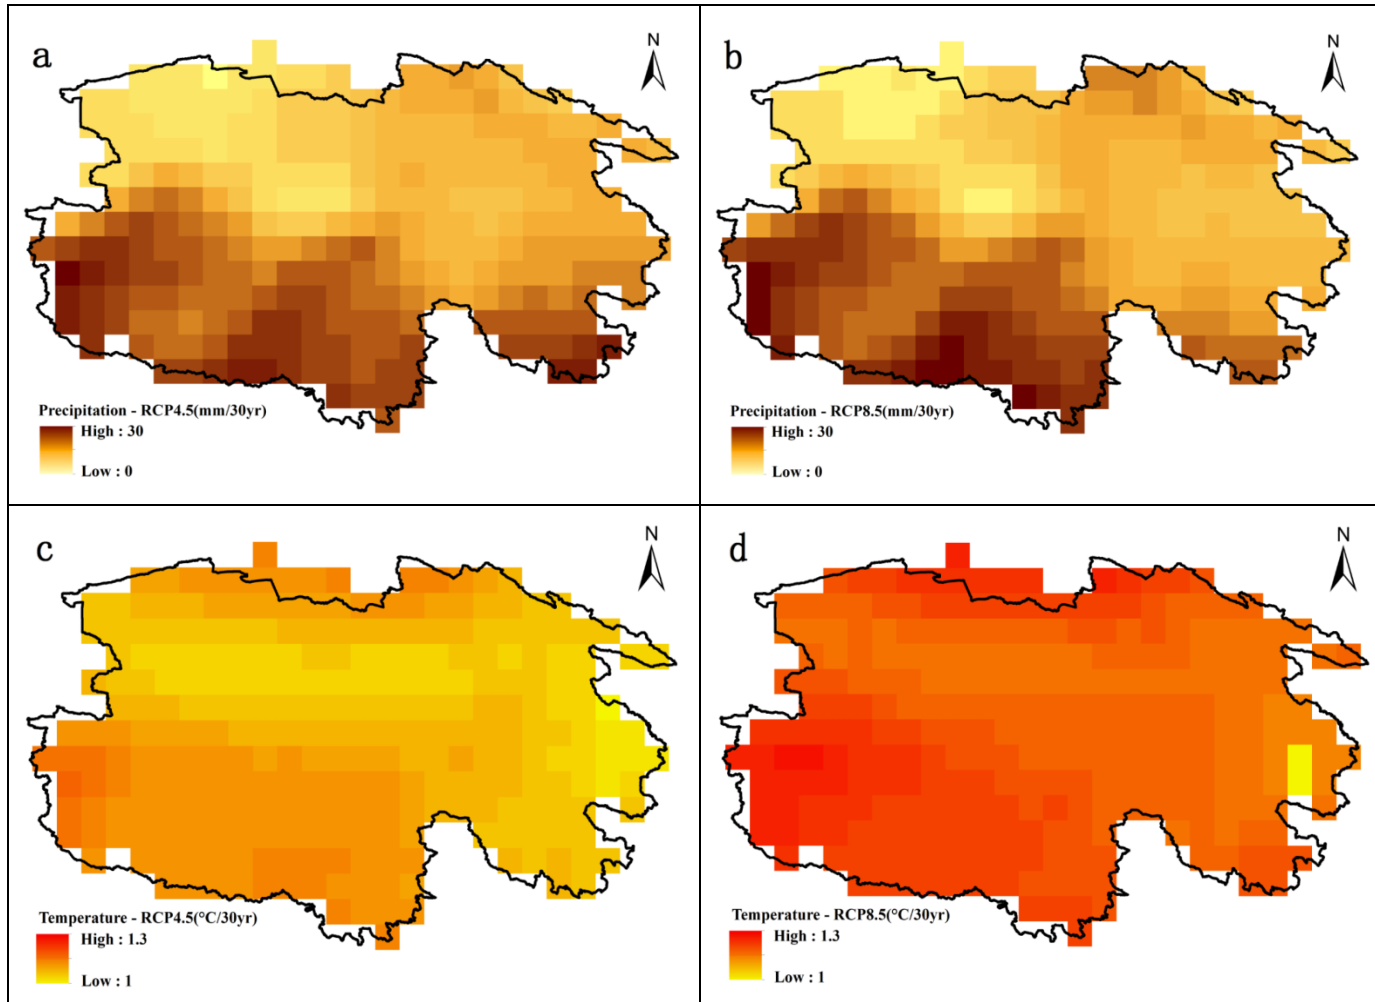

Fig. S2. Spatial distributions of precipitation and changes in temperature under the RCP4.5 (a, c) and RCP 8.5 (b, d) climate change scenarios up to 2044.
